# Supplementary material for: Using social and sexual networking mobile applications to promote HIV testing, medical care and prevention services among Latino men who have sex with men in Los Angeles County, California, USA
Source: PLoS One. 2022 May 13;17(5):e0268406. doi: 10.1371/journal.pone.0268406 (PMC9106153; doi:10.1371/journal.pone.0268406)
Supplement: S3 File — (XLS) [file pone.0268406.s003.xls]

## Sheet: Final Survey
Firsttest	Date	HIVstatus	Language	SPA	Q1	Q1app	Q2	Q3M	Q3TU	Q3W	Q3TH	Q3F	Q3SA	Q3SU	Q4EM	Q4M	Q4A	Q4E	Q4L	Q5	Q5Other	Q6Sexhookup	Q6Party	Q6Sexwork	Q6Escort	Q6Dating	Q6Loneliness	Q6Boredom	Q6Entertainment	Q6Meet	Q6Friend	Q6Stay	Q6Other	Q6OtherSpe	Q7	agegroup	Q8	Q23	Q24	CoB	Q25	Q9	Edu	Q9Other	Q10	Employment	Q10Other	Q11	Income
Yes	2015-12-21	Negative	English	SPA3		Growler	7	Yes	Yes	Yes	Yes	Yes	Yes	Yes	No	Yes	No	No	Yes	To meet someone		Yes	No	No	No	No	No	Yes	Yes	Yes	Yes	No	No		31	26-35	91789	Mexico	United States	United States	N/A	Bachelor’s degree	Bachelor’s degree		Working part-time	Working part time		$10001-$15000	$0~$15000
Yes	2015-12-22	Negative	English	SPA4		Grindr	3	No	No	No	No	Yes	Yes	Yes	Yes	Yes	No	No	No	Dating		No	No	No	No	Yes	No	Yes	No	Yes	No	No	No		27	26-35	90006	El Salvador	United States	United States	N/A	Some college	Some college		Working part-time	Working part time		$0-$5000	$0~$15000
Yes	2015-12-23	Positive	English	SPA3		Grindr	4	Yes	Yes	Yes	Yes	Yes	No	No	No	No	No	Yes	Yes	Boredom		Yes	No	No	No	No	Yes	Yes	No	Yes	Yes	No	No		23	18-25	91762	Mexico	United States	United States	N/A	Some college	Some college		Working full time	Working full time		$25001-$30000	$15001~$30000
Yes	2015-12-23	Negative	English	SPA3		Grindr	5	Yes	Yes	Yes	Yes	Yes	No	No	No	No	Yes	Yes	No	To meet someone		No	No	No	No	Yes	Yes	Yes	Yes	Yes	Yes	No	No		22	18-25	91762	Mexico	United States	United States	N/A	Bachelor’s degree	Bachelor’s degree		Working full time	Working full time		$15001-$20000	$15001~$30000
Yes	2015-12-28	Negative	English	SPA3		Grindr	7	Yes	Yes	Yes	Yes	Yes	Yes	Yes	Yes	Yes	Yes	Yes	Yes	Entertainment		Yes	No	No	No	Yes	No	Yes	Yes	Yes	Yes	No	No		38	36-45	91709	Nicaragua, Honduras, Belize	Belize	Other	2	Some college	Some college		Working full time	Working full time		$35001-$40000	More than $30000
Yes	2015-12-28	Negative	English	SPA4		Growler	7	No	No	No	Yes	Yes	No	No	Yes	No	Yes	Yes	No	Friendship (to keep in touch, to see who is there)		Yes	No	No	No	No	No	Yes	Yes	No	No	No	Yes		24	18-25	90059	Mexico	United States	United States	N/A	Technical degree	Technical degree		Working full time	Working full time		$20001-$25000	$15001~$30000
Yes	2015-12-28	Negative	English	SPA4		Growler	5	Yes	Yes	Yes	Yes	Yes	No	No	Yes	No	Yes	Yes	No	Friendship (to keep in touch, to see who is there)		Yes	No	No	No	No	No	Yes	Yes	No	No	No	No		31	26-35	90059	Puerto Rico & Mexico	United States	United States	N/A	Some college	Some college		Unemployed and looking for work	Unemployed and looking for work
Yes	2015-12-28	Negative	English	SPA4		Growler	2	No	No	No	No	No	Yes	Yes	No	No	No	No	No	Sex (hook-up)		No	Yes	No	No	No	No	No	No	No	No	No	Yes		28	26-35	90059	Spain & Mexico	United States	United States	N/A	Bachelor’s degree	Bachelor’s degree		Disabled and not working	Disabled and not working		$0-$5000	$0~$15000
Yes	2015-12-29	Negative	English	SPA3		Growler	7	Yes	Yes	Yes	Yes	Yes	Yes	Yes	No	Yes	Yes	Yes	Yes	Sex (hook-up)		Yes	No	No	No	Yes	Yes	Yes	Yes	Yes	Yes	No	No		27	26-35	92697	Mexico, Guatemala	Guatemala	Other	5	Some college	Some college		Working part-time	Working part time		$10001-$15000	$0~$15000
Yes	2015-12-30	Negative	English	SPA7		Growler	7	Yes	Yes	Yes	Yes	Yes	Yes	Yes	No	No	No	Yes	Yes	Friendship (to keep in touch, to see who is there)		Yes	No	No	No	No	No	No	No	No	No	No	No		28	26-35	90022	Mexico	Mexico	Mexico	3	Grade 12	Grade 12		Working part-time	Working part time		$10001-$15000	$0~$15000
Yes	2015-12-30	Negative	English	SPA4		Grindr	7	Yes	Yes	Yes	Yes	Yes	Yes	Yes	Yes	Yes	Yes	Yes	No	Boredom		No	No	No	No	No	No	No	Yes	No	No	No	Yes		23	18-25	90031	Mexico	United States	United States	N/A	Bachelor’s degree	Bachelor’s degree		Working full time	Working full time		$40001-$45000	More than $30000
Yes	2015-12-31	Negative	English	SPA4		Grindr	2	No	No	No	No	No	Yes	Yes	No	No	No	Yes	No	Sex (hook-up)		No	No	No	No	Yes	No	No	No	No	Yes	No	No		45	36-45	90038	Brazil	Brazil	Other	24	Bachelor’s degree	Bachelor’s degree		Working part-time	Working part time		$15001-$20000	$15001~$30000
Yes	2016-01-05	Negative	English	SPA4		Grindr	5	No	Yes	No	No	Yes	Yes	Yes	Yes	No	Yes	No	No	Dating		Yes	No	No	No	No	No	Yes	Yes	Yes	Yes	No	Yes		36	36-45	90057	Mexico (Mom side is white)	United States	United States	N/A	Bachelor’s degree	Bachelor’s degree		Working full time	Working full time		$40001-$45000	More than $30000
Yes	2016-01-08	Negative	English	SPA7		Growler	7	Yes	Yes	Yes	Yes	Yes	Yes	No	No	No	Yes	Yes	Yes	Sex (hook-up)		No	No	No	No	No	Yes	No	Yes	No	No	No	No		27	26-35	90033	Mexico	Mexico	Mexico	3	Bachelor’s degree	Bachelor’s degree		Working part-time	Working part time		$20001-$25000	$15001~$30000
Yes	2016-01-08	Negative	English	SPA3		Growler	7	Yes	Yes	Yes	Yes	Yes	Yes	Yes	No	No	Yes	No	Yes	Friendship (to keep in touch, to see who is there)		No	No	No	No	No	No	Yes	No	Yes	Yes	No	No		25	18-25	91767	Mexico-Mother (Dad unknown) Foster Care	United States	United States	N/A	Some college	Some college		Unemployed and looking for work	Unemployed and looking for work		$5001-$10000	$0~$15000
Yes	2016-01-08	Negative	English	SPA3		Growler	5	No	Yes	Yes	No	Yes	Yes	Yes	No	No	No	Yes	Yes	Boredom		No	No	No	No	No	No	Yes	Yes	No	Yes	No	No		24	18-25	91767	Mexico	United States	United States	N/A	Some college	Some college		Working part-time	Working part time		$30001-$35000	More than $30000
Yes	2016-01-09	Negative	English	SPA7		Grindr	7	Yes	Yes	Yes	Yes	Yes	Yes	Yes	No	No	No	Yes	Yes	Boredom		Yes	No	No	No	No	No	No	Yes	No	No	No	No		26	26-35	90022	Mexico	United States	United States	N/A	Bachelor’s degree	Bachelor’s degree		Working full time	Working full time		$40001-$45000	More than $30000
Yes	2016-01-11	Negative	Spanish	SPA7		Growler	7	No	No	No	No	Yes	Yes	No	No	No	Yes	No	No	Party and Play (sex and drugs)		No	No	No	No	Yes	No	No	No	No	Yes	No	No		45	36-45	90650	Mexico	Mexico	Mexico	8	Grade 12	Grade 12		Working part-time	Working part time		$0-$5000	$0~$15000
Yes	2016-01-12	Positive	English	SPA7		Growler	1	Yes	Yes	Yes	Yes	Yes	Yes	Yes	No	Yes	No	No	No	Boredom		No	No	No	No	No	No	No	No	Yes	Yes	No	No		23	18-25	90033	Mexico	United States	United States	N/A	Some college	Some college		Working full time	Working full time		$30001-$35000	More than $30000
Yes	2016-01-14	Negative	English	SPA3		Growler	4	No	Yes	No	No	Yes	Yes	Yes	No	No	Yes	Yes	Yes	Boredom		Yes	No	No	No	Yes	Yes	Yes	Yes	Yes	Yes	No	No		24	18-25	91789	Mexico (Father)	United States	United States	N/A	Associate degree	Associate degree		Working full time	Working full time		$5001-$10000	$0~$15000
Yes	2016-01-17	Negative	English	SPA7		Growler	2	No	Yes	Yes	No	No	No	No	Yes	Yes	No	No	No	Sex (hook-up)		Yes	No	No	No	No	No	No	No	No	No	No	No		27	26-35	90022	Mexico	United States	United States	N/A	Some college	Some college		Unemployed and looking for work	Unemployed and looking for work		$0-$5000	$0~$15000
Yes	2016-01-17	Negative	English	SPA7		Growler	3	Yes	Yes	Yes	No	No	No	No	No	No	No	Yes	No	To meet someone		Yes	Yes	Yes	Yes	Yes	Yes	Yes	Yes	Yes	Yes	Yes	No		21	18-25	90640		United States	United States	N/A	Some college	Some college		Working part-time	Working part time		$10001-$15000	$0~$15000
Yes	2016-01-17	Negative	English	SPA7		Growler	7	Yes	Yes	Yes	Yes	Yes	Yes	Yes	Yes	Yes	Yes	Yes	Yes	Entertainment		Yes	No	No	No	Yes	Yes	Yes	Yes	Yes	Yes	Yes	No		25	18-25	90022	Puerto Rico	Japan	Other	16	Associate degree	Associate degree		Working full time	Working full time		$40001-$45000	More than $30000
Yes	2016-01-19	Negative	English	SPA7		Growler	5	Yes	Yes	Yes	Yes	Yes	No	No	No	Yes	Yes	No	No	Sex (hook-up)		No	No	No	No	No	No	Yes	Yes	No	No	No	No		29	26-35	90022	US.	United States	United States	N/A	Associate degree	Associate degree		Working part-time	Working part time		$20001-$25000	$15001~$30000
Yes	2016-01-19	Negative	English	SPA4		Grindr	7	No	No	No	Yes	Yes	Yes	Yes	Yes	No	No	Yes	No	To meet someone		No	No	No	No	Yes	No	Yes	No	No	No	No	Yes		18	18-25	90032	Mexico	United States	United States	N/A	Some college	Some college		Working part-time	Working part time		$0-$5000	$0~$15000
Yes	2016-01-20	Negative	English	SPA7		Grindr	7	Yes	Yes	Yes	Yes	Yes	Yes	Yes	No	No	Yes	Yes	No	Boredom		No	No	No	No	No	No	Yes	Yes	Yes	No	No	No		32	26-35	91762	Mexico	United States	United States	N/A	Some college	Some college		Working full time	Working full time		$15001-$20000	$15001~$30000
Yes	2016-01-20	Negative	Spanish	SPA7		Growler	7	Yes	Yes	Yes	Yes	Yes	Yes	Yes	Yes	Yes	Yes	Yes	Yes	Entertainment		Yes	No	No	No	No	Yes	Yes	No	No	No	No	No		31	26-35	90022	Mexico	Mexico	Mexico	3	Other	Other	Master's Degree	Working full time	Working full time		More than $50000	More than $30000
Yes	2016-01-20	Negative	Spanish	SPA3		Grindr	7	Yes	Yes	Yes	Yes	Yes	Yes	Yes	No	No	No	Yes	Yes	Sex (hook-up)		Yes	No	No	No	No	No	Yes	Yes	Yes	Yes	No	No		51	46-55	92335	Mexico	Mexico	Mexico	40	Bachelor’s degree	Bachelor’s degree		Working full time	Working full time		$25001-$30000	$15001~$30000
Yes	2016-01-20	Negative	English	SPA4		Growler	7	Yes	Yes	Yes	Yes	Yes	Yes	Yes	Yes	No	No	Yes	No	Boredom		No	No	No	No	No	No	No	Yes	No	Yes	No	Yes		50	46-55	90029	Spain (other category?)	Venezuela	Other	9	Bachelor’s degree	Bachelor’s degree		Unemployed and looking for work	Unemployed and looking for work		$20001-$25000	$15001~$30000
Yes	2016-01-20	Negative	English	SPA4		Growler	7	Yes	Yes	Yes	Yes	Yes	Yes	Yes	Yes	No	No	Yes	No	Boredom		No	No	No	No	Yes	No	No	Yes	No	Yes	No	No		25	18-25	90005	Mexico	Mexico	Mexico	1	Some college	Some college		Other (e.g. student, day laborer)	Other (e.g. student, day laborer)	Freelance Artist	$0-$5000	$0~$15000
Yes	2016-01-21	Positive	English	SPA4		Grindr	7	Yes	Yes	Yes	Yes	Yes	Yes	Yes	Yes	No	Yes	No	Yes	Friendship (to keep in touch, to see who is there)		Yes	No	No	No	Yes	No	No	No	Yes	Yes	No	No		21	18-25	91754	Mexico	United States	United States	N/A	Some college	Some college		Working full time	Working full time		$20001-$25000	$15001~$30000
Yes	2016-01-22	Positive	English	SPA3		Grindr	7	Yes	Yes	Yes	Yes	Yes	Yes	Yes	Yes	Yes	Yes	Yes	Yes	Sex (hook-up)		Yes	Yes	Yes	No	Yes	Yes	Yes	Yes	Yes	Yes	No	No		29	26-35	91767	Mexico	United States	United States	N/A	Grade 12	Grade 12		Unemployed and looking for work	Unemployed and looking for work		$15001-$20000	$15001~$30000
Yes	2016-01-24	Negative	English	SPA3		Growler	7	Yes	Yes	Yes	Yes	Yes	Yes	Yes	Yes	Yes	Yes	Yes	Yes	Sex (hook-up)		Yes	No	No	No	No	No	Yes	Yes	No	No	No	No		25	18-25	92802	Colombia(Mother), Mexico (Father)	United States	United States	N/A	Some college	Some college		Working full time	Working full time		$15001-$20000	$15001~$30000
Yes	2016-01-26	Negative	English	SPA7		Grindr	7	Yes	Yes	Yes	Yes	No	No	No	No	No	Yes	Yes	No	Boredom		Yes	No	No	No	No	No	Yes	No	Yes	No	No	No		24	18-25	90255	Mexico	United States	United States	N/A	Some college	Some college		Unemployed and looking for work	Unemployed and looking for work		$0-$5000	$0~$15000
Yes	2016-01-27	Negative	English	SPA7		Grindr	7	No	No	No	No	No	Yes	No	No	No	No	Yes	No	Sex (hook-up)		Yes	No	No	No	Yes	No	Yes	No	No	Yes	No	No		22	18-25	90011				Declined to answer	Some college	Some college		Working full time	Working full time		$25001-$30000	$15001~$30000
Yes	2016-01-27	Negative	English	SPA7		Scruff	7	Yes	Yes	Yes	Yes	Yes	Yes	Yes	Yes	Yes	Yes	Yes	Yes	Friendship (to keep in touch, to see who is there)		Yes	No	No	No	No	Yes	Yes	No	Yes	Yes	No	No		35	26-35	90007	Mexico	United States	United States	N/A	Bachelor’s degree	Bachelor’s degree		Working full time	Working full time		$25001-$30000	$15001~$30000
Yes	2016-02-01	Negative	Spanish	SPA4		Growler	4	No	No	No	Yes	Yes	Yes	Yes	Yes	No	No	Yes	No	Sex (hook-up)		No	No	No	No	No	No	No	Yes	No	No	No	No		30	26-35	90044	Fam/Parents in Mexico	Mexico	Mexico	29	Some college	Some college		Working full time	Working full time		$0-$5000	$0~$15000
Yes	2016-02-02	Negative	English	SPA7		Grindr	7	No	Yes	Yes	No	No	No	No	Yes	No	No	No	Yes	Entertainment		No	No	No	No	No	No	No	No	No	Yes	No	No		28	26-35	91801	Mexico	United States	United States	N/A	Bachelor’s degree	Bachelor’s degree		Working full time	Working full time		More than $50000	More than $30000
Yes	2016-02-03	Negative	English	SPA3		Grindr	7	Yes	Yes	Yes	Yes	Yes	Yes	Yes	Yes	Yes	Yes	Yes	Yes	To meet someone		Yes	No	No	No	Yes	Yes	No	Yes	No	No	No	No		20	18-25	91767	Mexico	United States	United States	N/A	Grade 12	Grade 12		Unemployed and looking for work	Unemployed and looking for work		$0-$5000	$0~$15000
Yes	2016-02-03	Negative	Spanish	SPA7		Grindr	3	No	No	Yes	No	No	Yes	Yes	No	No	Yes	No	No	Sex (hook-up)		No	No	No	No	No	Yes	No	No	No	Yes	No	No		33	26-35	90022	Mexico	Mexico	Mexico	21	Grade 12	Grade 12		Working full time	Working full time		$20001-$25000	$15001~$30000
Yes	2016-02-05	Negative	English	SPA3		Grindr	7	Yes	Yes	Yes	Yes	Yes	Yes	Yes	No	No	Yes	No	No	Loneliness		Yes	No	No	No	Yes	No	Yes	No	Yes	Yes	No	No		21	18-25	91766	Mexico	United States	United States	N/A	Grade 12	Grade 12		Working part-time	Working part time		$10001-$15000	$0~$15000
Yes	2016-02-09	Negative	Spanish	SPA3		Grindr	1	No	No	No	No	Yes	No	No	No	No	Yes	No	No	Sex (hook-up)		Yes	No	No	No	No	No	No	No	No	Yes	No	No		30	26-35	92571	El Salvador	El Salvador	Other	18	Grade 12	Grade 12		Working full time	Working full time		$15001-$20000	$15001~$30000
Yes	2016-02-16	Negative	English	SPA4		Grindr	3	Yes	Yes	No	No	Yes	Yes	No	Yes	No	No	Yes	No	Boredom		Yes	No	No	No	No	No	No	Yes	No	No	No	Yes		35	26-35	91702	Mexico	Mexico	Mexico	6	Some college	Some college		Working full time	Working full time		More than $50000	More than $30000
Yes	2016-02-17	Negative	English	SPA4		Growler	7	Yes	Yes	Yes	Yes	Yes	Yes	Yes	Yes	Yes	Yes	Yes	No	Sex (hook-up)		No	No	No	No	Yes	No	No	Yes	No	Yes	No	No		38	36-45	90026	Mexico	United States	United States	N/A	Some college	Some college		Working full time	Working full time		$20001-$25000	$15001~$30000
Yes	2016-02-18	Negative	English	SPA4		Growler	7	Yes	Yes	Yes	Yes	Yes	Yes	Yes	Yes	No	No	Yes	No	Boredom		Yes	No	No	No	No	No	Yes	Yes	No	Yes	No	No		22	18-25	90006	Mexico	United States	United States	N/A	Grade 12	Grade 12		Working full time	Working full time		$15001-$20000	$15001~$30000
Yes	2016-02-18	Negative	English	SPA4		Growler	7	Yes	Yes	Yes	Yes	Yes	Yes	Yes	Yes	Yes	No	No	Yes	Sex (hook-up)		No	No	No	No	Yes	No	Yes	Yes	No	No	No	No		24	18-25	90006	El Salvador	United States	United States	N/A	Bachelor’s degree	Bachelor’s degree		Working part-time	Working part time		$10001-$15000	$0~$15000
Yes	2016-02-18	Negative	English	SPA4		Growler	7	Yes	Yes	Yes	Yes	Yes	Yes	Yes	Yes	Yes	No	Yes	No	Dating		Yes	No	No	No	Yes	No	Yes	Yes	No	Yes	No	Yes		28	26-35	90201	El Salvador	United States	United States	N/A	Bachelor’s degree	Bachelor’s degree		Working full time	Working full time		$45001-$50000	More than $30000
Yes	2016-02-19	Negative	English	SPA4		Growler	4	No	No	Yes	Yes	Yes	Yes	No	Yes	No	No	Yes	Yes	Sex (hook-up)		No	Yes	Yes	No	Yes	Yes	Yes	Yes	Yes	Yes	No	No	To network for finding jobs	26	26-35	90032	El Salvador & Guatemala	United States	United States	N/A	Bachelor’s degree	Bachelor’s degree		Working full time	Working full time		$35001-$40000	More than $30000
Yes	2016-02-22	Negative	English	SPA7		Grindr	7	Yes	Yes	Yes	Yes	Yes	Yes	Yes	Yes	Yes	Yes	Yes	Yes	Boredom		Yes	No	No	No	Yes	No	No	No	Yes	Yes	No	No		23	18-25	90007	Mexico	United States	United States	N/A	Some college	Some college		Unemployed and not looking for work	Unemployed and not looking for work		$0-$5000	$0~$15000
Yes	2016-02-22	Negative	English	SPA3		Growler	7	Yes	Yes	Yes	Yes	Yes	Yes	Yes	Yes	Yes	Yes	Yes	Yes	To meet someone		Yes	No	Yes	No	No	No	No	No	No	No	No	No		25	18-25	91766	Mexico	Mexico	Mexico	5	Grades 9 through 11	Grades 9 through 11		Unemployed and looking for work	Unemployed and looking for work		$0-$5000	$0~$15000
Yes	2016-02-22	Negative	Spanish	SPA3		Grindr	4	No	No	No	Yes	Yes	Yes	Yes	Yes	Yes	Yes	Yes	Yes	Sex (hook-up)		No	No	No	No	No	No	Yes	No	No	No	No	No		24	18-25	92335	Mexico	Mexico	Mexico	13	Grade 12	Grade 12		Working full time	Working full time		$15001-$20000	$15001~$30000
Yes	2016-02-25	Negative	Spanish	SPA3		Grindr	7	Yes	Yes	Yes	Yes	Yes	Yes	Yes	No	No	Yes	Yes	No	To meet someone		No	No	No	No	No	Yes	Yes	No	Yes	Yes	No	No		38	36-45	91761	Mexico	Mexico	Mexico	36	Bachelor’s degree	Bachelor’s degree		Working full time	Working full time		$5001-$10000	$0~$15000
Yes	2016-03-02	Positive	English	SPA4		Growler	4	No	No	No	Yes	Yes	Yes	Yes	No	No	No	Yes	Yes	Sex (hook-up)		No	No	No	No	Yes	Yes	Yes	No	No	Yes	No	No		22	18-25	92704	Mexico	Mexico	Mexico	1	Grade 12	Grade 12		Unemployed and looking for work	Unemployed and looking for work		$10001-$15000	$0~$15000
Yes	2016-03-02	Negative	English	SPA4		Growler	4	No	No	No	No	Yes	Yes	Yes	No	No	No	No	Yes	To meet someone		Yes	No	No	No	No	Yes	Yes	No	No	Yes	No	No		23	18-25	90003	Mexico & Guatemala	Mexico	Mexico	3	Some college	Some college		Unemployed and looking for work	Unemployed and looking for work		$0-$5000	$0~$15000
Yes	2016-03-09	Negative	English	SPA3		Growler	4	No	No	Yes	No	Yes	Yes	Yes	No	No	Yes	Yes	No	Friendship (to keep in touch, to see who is there)		No	No	No	No	No	Yes	Yes	No	Yes	No	No	No		24	18-25	91766	Mexico	Mexico	Mexico	9	Grade 12	Grade 12		Unemployed and looking for work	Unemployed and looking for work		$0-$5000	$0~$15000
Yes	2016-03-10	Negative	English	SPA7		Growler	7	Yes	Yes	Yes	Yes	Yes	Yes	Yes	Yes	Yes	Yes	Yes	Yes	To meet someone		Yes	No	No	No	Yes	Yes	Yes	Yes	Yes	Yes	No	No		37	36-45	90604	Mexico	United States	United States	N/A	Technical degree	Technical degree		Unemployed and looking for work	Unemployed and looking for work		$25001-$30000	$15001~$30000
Yes	2016-03-10	Negative	English	SPA7		Growler	7	Yes	Yes	Yes	Yes	Yes	Yes	Yes	Yes	Yes	Yes	Yes	Yes	Dating		Yes	No	No	No	No	Yes	No	No	Yes	No	No	No		31	26-35	90606	Mexico	United States	United States	N/A	Technical degree	Technical degree		Working full time	Working full time		$45001-$50000	More than $30000
Yes	2016-03-16	Negative	English	SPA3		Grindr	7	Yes	Yes	Yes	Yes	Yes	Yes	Yes	Yes	Yes	Yes	Yes	Yes	Entertainment		Yes	No	No	No	No	No	Yes	No	No	Yes	No	No		24	18-25	91702	Mexico	United States	United States	N/A	Some college	Some college		Working full time	Working full time		$35001-$40000	More than $30000
Yes	2016-03-16	Negative	English	SPA3		Grindr	5	No	No	Yes	Yes	Yes	Yes	Yes	No	No	No	Yes	Yes	Sex (hook-up)		Yes	No	No	No	No	No	No	Yes	Yes	No	No	No		23	18-25	91768	Mexico	United States	United States	N/A	Associate degree	Associate degree		Other (e.g. student, day laborer)	Other (e.g. student, day laborer)	Student	$10001-$15000	$0~$15000
Yes	2016-03-17	Positive	English	SPA4		Growler	2	No	No	No	No	Yes	Yes	Yes	No	No	Yes	Yes	No	Loneliness		No	No	No	No	No	No	Yes	No	Yes	No	No	No		22	18-25	90057	Mexico and White	United States	United States	N/A	Some college	Some college		Unemployed and looking for work	Unemployed and looking for work		$0-$5000	$0~$15000
Yes	2016-03-17	Negative	English	SPA4		Grindr	7	Yes	Yes	Yes	Yes	Yes	Yes	Yes	No	No	Yes	Yes	No	Friendship (to keep in touch, to see who is there)		Yes	No	No	No	Yes	No	Yes	Yes	Yes	Yes	No	No		26	26-35	90057	Mexico	United States	United States	N/A	Some college	Some college		Working part-time	Working part time		$5001-$10000	$0~$15000
Yes	2016-03-18	Negative	English	SPA3		Growler	7	Yes	Yes	Yes	Yes	Yes	Yes	Yes	No	No	No	Yes	Yes	Dating		Yes	No	No	No	No	No	Yes	No	Yes	Yes	No	No		31	26-35	91786	Mexico (Father) Guatemala (Mother	United States	United States	N/A	Grade 12	Grade 12		Working full time	Working full time		$35001-$40000	More than $30000
Yes	2016-03-23	Negative	English	SPA4		Grindr	5	Yes	No	Yes	No	Yes	Yes	Yes	No	No	Yes	Yes	No	To meet someone		No	No	No	No	Yes	Yes	Yes	No	No	No	No	No		19	18-25	90201	Mexico	United States	United States	N/A	Grade 12	Grade 12		Working part-time	Working part time		$0-$5000	$0~$15000
Yes	2016-04-01	Negative	English	SPA4		Grindr	2	No	No	No	Yes	No	Yes	No	No	Yes	No	Yes	Yes	Boredom		Yes	No	No	No	Yes	No	Yes	No	Yes	No	No	No		56	56-65	90063	Mexico	United States	United States	N/A	Associate degree	Associate degree		Working part-time	Working part time	Self Employed	$35001-$40000	More than $30000
No	2016-04-11	Negative	English	SPA4		Growler	7	Yes	Yes	Yes	Yes	Yes	Yes	Yes	No	No	No	Yes	Yes	Sex (hook-up)		No	No	No	No	No	No	No	Yes	No	No	No	No		62	56-65	90005	Mexico	United States	United States	N/A	Some college	Some college		Disabled and not working	Disabled and not working		$10001-$15000	$0~$15000
Yes	2016-04-13	Negative	English	SPA4		Growler	7	Yes	Yes	Yes	Yes	Yes	Yes	Yes	No	No	No	Yes	Yes	Sex (hook-up)		No	No	No	No	No	No	No	No	Yes	Yes	No	No		51	46-55	84103	Colombia	Colombia	Other	12	Other	Other	Ph.D.	Working full time	Working full time		More than $50000	More than $30000
Yes	2016-04-13	Negative	Spanish	SPA4		Grindr	5	No	No	Yes	Yes	Yes	Yes	Yes	No	No	Yes	Yes	No	To meet someone		Yes	No	No	No	Yes	No	No	Yes	Yes	No	No	No		25	18-25	91103	Mexico	Mexico	Mexico	24	Some college	Some college		Working full time	Working full time		$15001-$20000	$15001~$30000
Yes	2016-04-15	Negative	English	SPA7		Grindr	7	Yes	Yes	Yes	Yes	Yes	Yes	Yes	No	No	Yes	Yes	Yes	Friendship (to keep in touch, to see who is there)		Yes	No	Yes	No	No	No	Yes	Yes	Yes	Yes	No	No		30	26-35	90059	Mexico	Mexico	Mexico	3	Grade 12	Grade 12		Working part-time	Working part time		$0-$5000	$0~$15000
Yes	2016-04-15	Negative	English	SPA7		Grindr	5	No	No	No	No	Yes	Yes	Yes	No	No	Yes	Yes	No	Friendship (to keep in touch, to see who is there)		Yes	No	No	No	Yes	Yes	Yes	Yes	Yes	Yes	No	No		26	26-35	90250	Mexico	United States	United States	N/A	Some college	Some college		Working part-time	Working part time		$10001-$15000	$0~$15000
Yes	2016-04-15	Negative	English	SPA7		Growler	7	Yes	Yes	Yes	Yes	Yes	Yes	Yes	No	No	No	Yes	No	Friendship (to keep in touch, to see who is there)		No	No	No	No	No	Yes	Yes	Yes	No	No	No	No		27	26-35	91343	Mexico	United States	United States	N/A	Other	Other	Graduate School	Working full time	Working full time		$0-$5000	$0~$15000
Yes	2016-04-18	Negative	English	SPA3		Growler	2	Yes	No	No	Yes	No	No	No	No	Yes	No	No	No	Boredom		Yes	No	No	No	No	No	Yes	No	Yes	No	No	No		25	18-25	91767	Mexico(Maternal Grandmother)	United States	United States	N/A	Associate degree	Associate degree		Working full time	Working full time		$30001-$35000	More than $30000
Yes	2016-04-18	Negative	English	SPA4		Grindr	5	No	No	Yes	Yes	Yes	Yes	Yes	No	No	No	Yes	No	Boredom		Yes	No	No	No	Yes	Yes	No	Yes	Yes	No	No	No		26	26-35	90250	Mexico	United States	United States	N/A	Some college	Some college		Working full time	Working full time		$15001-$20000	$15001~$30000
Yes	2016-04-18	Negative	English	SPA4		Grindr	7	Yes	Yes	Yes	Yes	Yes	Yes	Yes	No	No	No	Yes	Yes	Entertainment		Yes	No	No	No	Yes	No	No	No	No	Yes	No	No		30	26-35	90250	Mexico	Mexico	Mexico	2	Other	Other	Finished up to 9th Grade	Working part-time	Working part time		$0-$5000	$0~$15000
Yes	2016-04-19	Negative	English	SPA7		Growler	7	Yes	Yes	Yes	Yes	Yes	Yes	Yes	Yes	Yes	Yes	Yes	Yes	Entertainment		Yes	No	No	No	Yes	No	No	No	Yes	No	No	No		41	36-45	90032	Mexico	Mexico	Mexico	4	Technical degree	Technical degree		Working full time	Working full time	Working part-time as well	$25001-$30000	$15001~$30000
Yes	2016-04-20	Negative	English	SPA7		Grindr	2	No	No	No	No	Yes	Yes	No	No	No	No	Yes	No	Friendship (to keep in touch, to see who is there)		No	No	No	No	Yes	No	No	No	Yes	Yes	No	No		25	18-25	90006	Spain/El Salvador	United States	United States	N/A	Associate degree	Associate degree		Working part-time	Working part time		$15001-$20000	$15001~$30000
Yes	2016-04-21	Negative	English	SPA4		Growler	7	Yes	Yes	Yes	Yes	Yes	Yes	Yes	No	No	Yes	No	No	Boredom		Yes	No	No	No	No	No	No	Yes	Yes	Yes	No	No		38	36-45	90029	Puerto Rico	United States	United States	N/A	Associate degree	Associate degree		Working part-time	Working part time		$40001-$45000	More than $30000
Yes	2016-04-21	Negative	English	SPA4		Growler	4	Yes	Yes	Yes	Yes	No	No	No	No	Yes	No	No	No	Entertainment		Yes	No	No	No	No	No	No	No	Yes	Yes	No	No		30	26-35	90028	Belize	United States	United States	N/A	Bachelor’s degree	Bachelor’s degree		Disabled and not working	Disabled and not working		$35001-$40000	More than $30000
Yes	2016-04-21	Negative	English	SPA7		Growler	4	Yes	Yes	Yes	Yes	Yes	No	No	No	No	Yes	No	No	To meet someone		Yes	No	No	No	Yes	No	Yes	Yes	Yes	No	No	No		25	18-25	90650	El Salvador	El Salvador	Other	13	Technical degree	Technical degree		Working full time	Working full time		$15001-$20000	$15001~$30000
Yes	2016-04-22	Negative	English	SPA3		Growler	7	Yes	Yes	Yes	Yes	Yes	Yes	Yes	No	No	Yes	No	No	Dating		No	No	No	No	Yes	No	No	No	Yes	Yes	No	No		21	18-25	91767	Mexico	United States	United States	N/A	Technical degree	Technical degree		Working full time	Working full time		$5001-$10000	$0~$15000
Yes	2016-04-22	Positive	Spanish	SPA7		Grindr	7	Yes	Yes	Yes	Yes	Yes	Yes	Yes	No	Yes	No	Yes	Yes	Sex (hook-up)		No	No	No	No	No	No	Yes	Yes	Yes	Yes	No	No		43	36-45	90037	Mexico	Mexico	Mexico	28	Bachelor’s degree	Bachelor’s degree	Licenciatura Mexicana	Working part-time	Working part time		$10001-$15000	$0~$15000
Yes	2016-04-24	Negative	English	SPA4		Jack'd	7	Yes	Yes	Yes	Yes	Yes	Yes	Yes	No	No	No	No	Yes	Boredom		Yes	No	No	Yes	No	No	No	Yes	No	No	No	No		28	26-35	90017	Mexico	United States	United States	N/A	Technical degree	Technical degree		Working part-time	Working part time		$15001-$20000	$15001~$30000
No	2016-04-26	Negative	English	SPA3		Growler	3	No	No	Yes	Yes	Yes	No	No	No	Yes	No	Yes	Yes	Boredom		Yes	No	No	No	Yes	Yes	Yes	Yes	Yes	No	No	No		23	18-25	91762	Mexico	United States	United States	N/A	Bachelor’s degree	Bachelor’s degree		Working full time	Working full time		$10001-$15000	$0~$15000
Yes	2016-04-26	Negative	English	SPA7		Growler	7	Yes	Yes	Yes	Yes	Yes	Yes	Yes	No	No	Yes	Yes	No	To meet someone		No	No	No	No	No	No	No	No	No	Yes	No	No		24	18-25	90032	Mexico	United States	United States	N/A	Grade 12	Grade 12		Working full time	Working full time		$30001-$35000	More than $30000
Yes	2016-04-26	Negative	Spanish	SPA7		Growler	3	No	Yes	Yes	No	No	No	No	No	Yes	No	No	No	Sex (hook-up)		No	No	No	No	No	Yes	No	Yes	No	No	No	No		46	46-55	91801	Venezuela	Venezuela	Other	45	Some college	Some college		Unemployed and not looking for work	Unemployed and not looking for work		$10001-$15000	$0~$15000
Yes	2016-04-26	Negative	English	SPA7		Jack'd	4	No	No	No	Yes	Yes	Yes	Yes	No	No	Yes	Yes	No	Sex (hook-up)		No	No	No	No	No	No	Yes	Yes	Yes	Yes	No	No		20	18-25	90807	Mexico	United States	United States	N/A	Grade 12	Grade 12		Working full time	Working full time		$20001-$25000	$15001~$30000
Yes	2016-04-27	Negative	Spanish	SPA4		Grindr	7	Yes	Yes	Yes	Yes	Yes	Yes	Yes	Yes	No	No	Yes	Yes	To meet someone to get a place to stay		Yes	No	No	No	Yes	No	No	Yes	No	Yes	No	No		46	46-55	90038	Mexico	Mexico	Mexico	35	Bachelor’s degree	Bachelor’s degree		Working part-time	Working part time		$20001-$25000	$15001~$30000
Yes	2016-04-27	Positive	English	SPA4		Jack'd	7	Yes	Yes	Yes	Yes	Yes	Yes	Yes	Yes	Yes	Yes	Yes	Yes	Sex (hook-up)		No	No	No	No	No	No	Yes	No	No	No	No	No		32	26-35	90069	Peru	Peru	Other	7	Bachelor’s degree	Bachelor’s degree		Working full time	Working full time		$40001-$45000	More than $30000
Yes	2016-04-27	Negative	English	SPA4		Jack'd	7	Yes	Yes	Yes	Yes	Yes	Yes	Yes	No	No	No	Yes	No	Dating		No	No	No	No	No	No	Yes	No	Yes	Yes	No	No		24	18-25	90038	Mexico	United States	United States	N/A	Some college	Some college		Unemployed and looking for work	Unemployed and looking for work		$10001-$15000	$0~$15000
No	2016-04-27	Negative	English	SPA7		Growler	7	Yes	Yes	Yes	Yes	Yes	Yes	Yes	No	No	Yes	Yes	Yes	Boredom		Yes	No	No	No	No	No	No	Yes	No	No	No	No		27	26-35	90022	Mexico	United States	United States	N/A	Some college	Some college		Working part-time	Working part time		$10001-$15000	$0~$15000
Yes	2016-04-27	Negative	English	SPA7		Jack'd	7	Yes	Yes	Yes	Yes	Yes	Yes	Yes	Yes	Yes	Yes	Yes	Yes	To meet someone		Yes	No	No	No	Yes	Yes	Yes	No	Yes	Yes	No	No		27	26-35	90018	Puerto Rico	United States	United States	N/A	Associate degree	Associate degree		Working part-time	Working part time		$15001-$20000	$15001~$30000
Yes	2016-04-28	Positive	English	SPA4		Grindr	7	Yes	Yes	Yes	Yes	Yes	Yes	Yes	No	No	No	Yes	No	Party and Play (sex and drugs)		Yes	No	No	No	No	No	No	No	No	Yes	No	No		35	26-35	90015	Mexico	United States	United States	N/A	Some college	Some college		Other (e.g. student, day laborer)	Other (e.g. student, day laborer)	Disabled and on call for work	$10001-$15000	$0~$15000
Yes	2016-04-28	Negative	English	SPA7		Jack'd	7	Yes	Yes	Yes	Yes	Yes	Yes	Yes	No	No	Yes	Yes	No	Sex (hook-up)		No	No	No	No	No	No	Yes	Yes	Yes	No	No	No		24	18-25	91780	Mexico	United States	United States	N/A	Some college	Some college		Other (e.g. student, day laborer)	Other (e.g. student, day laborer)	Student intern	$0-$5000	$0~$15000
Yes	2016-04-28	Negative	English	SPA7		Growler	7	Yes	Yes	Yes	Yes	Yes	Yes	Yes	No	Yes	Yes	No	No	Boredom		No	No	No	No	No	No	No	No	Yes	No	No	No		31	26-35	90640	Spain/Mexico	United States	United States	N/A	Bachelor’s degree	Bachelor’s degree		Working part-time	Working part time	Two part-time positions	$20001-$25000	$15001~$30000
Yes	2016-04-29	Negative	English	SPA7		Jack'd	3	Yes	Yes	Yes	Yes	Yes	No	No	No	No	Yes	No	No	Boredom		No	No	No	No	No	No	No	Yes	Yes	Yes	No	No		23	18-25	90004	Mexico	United States	United States	N/A	Bachelor’s degree	Bachelor’s degree		Working part-time	Working part time		$0-$5000	$0~$15000
Yes	2016-04-29	Negative	English	SPA7		Jack'd	1	No	No	Yes	No	No	No	No	No	No	No	Yes	Yes	Sex (hook-up)		No	No	No	No	No	Yes	Yes	Yes	No	Yes	No	No		23	18-25	90004	Costa Rica	United States	United States	N/A	Bachelor’s degree	Bachelor’s degree		Working full time	Working full time		$5001-$10000	$0~$15000
Yes	2016-05-03	Negative	English	SPA4		Grindr	7	Yes	Yes	Yes	Yes	Yes	Yes	Yes	Yes	No	No	Yes	Yes	To meet someone		Yes	No	No	No	Yes	Yes	Yes	Yes	No	Yes	No	No		23	18-25	90028	Puerto Rico	United States	United States	N/A	GED	GED		Unemployed and not looking for work	Unemployed and not looking for work		$10001-$15000	$0~$15000
Yes	2016-05-03	Negative	English	SPA4		Jack'd	3	No	No	No	No	Yes	Yes	Yes	No	No	Yes	No	No	Entertainment		Yes	No	No	No	No	No	No	No	No	No	No	No		28	26-35	91335	Guatemala	United States	United States	N/A	Bachelor’s degree	Bachelor’s degree		Other (e.g. student, day laborer)	Other (e.g. student, day laborer)	Freelance worker	More than $50000	More than $30000
Yes	2016-05-03	Negative	English	SPA7		Growler	7	Yes	Yes	Yes	Yes	Yes	Yes	Yes	No	Yes	Yes	Yes	Yes	Loneliness		No	No	No	No	No	No	Yes	No	No	Yes	No	No		21	18-25	91702	Mexico	Mexico	Mexico	4	Some college	Some college		Unemployed and looking for work	Unemployed and looking for work		$0-$5000	$0~$15000
Yes	2016-05-04	Negative	English	SPA4		Jack'd	7	Yes	Yes	Yes	Yes	Yes	Yes	Yes	No	Yes	No	Yes	Yes	Sex (hook-up)		No	No	No	No	Yes	Yes	No	Yes	Yes	No	No	No		29	26-35	90280	El Salvador	United States	United States	N/A	Bachelor’s degree	Bachelor’s degree		Unemployed and looking for work	Unemployed and looking for work		$15001-$20000	$15001~$30000
Yes	2016-05-04	Negative	English	SPA7		Growler	7	Yes	Yes	Yes	Yes	Yes	Yes	Yes	Yes	Yes	Yes	Yes	Yes	Entertainment		No	No	No	No	No	No	Yes	No	No	Yes	No	No		36	36-45	90040	Mexico	United States	United States	N/A	Some college	Some college		Unemployed and not looking for work	Unemployed and not looking for work		More than $50000	More than $30000
Yes	2016-05-04	Negative	English	SPA7		Growler	3	Yes	Yes	Yes	Yes	Yes	No	No	No	No	No	Yes	Yes	Boredom		No	No	No	No	No	No	No	Yes	Yes	No	No	No		20	18-25	90040	Mexico	United States	United States	N/A	Grade 12	Grade 12		Working full time	Working full time		$30001-$35000	More than $30000
Yes	2016-05-05	Negative	English	SPA4		Jack'd	7	Yes	Yes	Yes	Yes	Yes	Yes	Yes	No	No	No	No	Yes	Boredom		Yes	No	No	No	Yes	No	No	No	No	No	No	No		21	18-25	91342	Mexico	United States	United States	N/A	Some college	Some college		Working part-time	Working part time		$10001-$15000	$0~$15000
Yes	2016-05-12	Negative	English	SPA7		Growler	2	No	No	No	No	No	Yes	Yes	No	No	Yes	Yes	Yes	Sex (hook-up)		No	No	No	No	No	No	Yes	No	Yes	No	No	No		22	18-25	90063	Mexico	United States	United States	N/A	Some college	Some college		Working full time	Working full time		$10001-$15000	$0~$15000
Yes	2016-05-13	Negative	English	SPA7		Growler	5	No	No	Yes	Yes	Yes	Yes	Yes	No	No	No	No	Yes	Sex (hook-up)		No	No	No	No	No	Yes	Yes	No	No	No	No	No		27	26-35	91105	Puerto Rico	United States	United States	N/A	Grades 9 through 11	Grades 9 through 11		Working part-time	Working part time		$5001-$10000	$0~$15000
Yes	2016-05-13	Negative	English	SPA7		Grindr	7	Yes	Yes	Yes	Yes	Yes	Yes	Yes	No	Yes	Yes	No	No	Sex (hook-up)		No	No	No	No	No	No	Yes	Yes	No	Yes	No	No		43	36-45	92805	Mexico	Mexico	Mexico	14	Bachelor’s degree	Bachelor’s degree		Working full time	Working full time		More than $50000	More than $30000
Yes	2016-05-16	Negative	English	SPA7		Growler	4	No	No	No	Yes	Yes	Yes	Yes	Yes	Yes	Yes	Yes	Yes	To meet someone		Yes	No	No	No	Yes	Yes	Yes	Yes	No	Yes	No	No		42	36-45	90063	Mexico	United States	United States	N/A	Technical degree	Technical degree		Working part-time	Working part time		$5001-$10000	$0~$15000
Yes	2016-05-16	Negative	English	SPA7		Growler	7	Yes	Yes	Yes	Yes	Yes	Yes	Yes	No	No	Yes	Yes	Yes	Sex (hook-up)		No	Yes	No	No	No	No	No	No	Yes	No	No	No		26	26-35	90031	Mexico/El Salvador/Puerto Rico	United States	United States	N/A	Grade 12	Grade 12		Unemployed and looking for work	Unemployed and looking for work		$0-$5000	$0~$15000
Yes	2016-05-16	Negative	English	SPA7		Grindr	7	Yes	Yes	Yes	Yes	Yes	Yes	Yes	No	No	Yes	No	No	Boredom		Yes	No	No	No	No	No	No	No	Yes	Yes	Yes	No		37	36-45	90059	El Salvador	United States	United States	N/A	Some college	Some college		Disabled and not working	Disabled and not working		$15001-$20000	$15001~$30000
Yes	2016-05-17	Negative	English	SPA3		Growler	7	Yes	Yes	Yes	Yes	Yes	Yes	Yes	No	No	No	No	Yes	Sex (hook-up)		Yes	No	No	No	Yes	No	No	No	No	No	No	No		22	18-25	90631	Mexico	United States	United States	N/A	Bachelor’s degree	Bachelor’s degree		Working part-time	Working part time		$15001-$20000	$15001~$30000
Yes	2016-05-17	Negative	English	SPA3		Growler	7	Yes	Yes	Yes	Yes	Yes	Yes	Yes	No	No	No	Yes	No	Boredom		Yes	No	No	No	No	No	Yes	Yes	Yes	Yes	No	No		23	18-25	92376	Mexico	United States	United States	N/A	Grade 12	Grade 12		Working full time	Working full time		$5001-$10000	$0~$15000
Yes	2016-05-17	Negative	English	SPA7		Grindr	5	No	No	Yes	Yes	Yes	Yes	Yes	No	No	No	Yes	No	To meet someone		Yes	No	No	No	No	No	Yes	No	No	Yes	No	No		30	26-35	90063	Mexico	Mexico	Mexico	8	Some college	Some college		Working full time	Working full time		$20001-$25000	$15001~$30000
Yes	2016-05-17	Negative	English	SPA7		Growler	7	Yes	Yes	Yes	Yes	Yes	Yes	Yes	No	No	Yes	Yes	Yes	Friendship (to keep in touch, to see who is there)		No	No	No	No	No	No	Yes	No	No	No	No	No		29	26-35	90033	Mexico	United States	United States	N/A	Bachelor’s degree	Bachelor’s degree		Unemployed and looking for work	Unemployed and looking for work		$25001-$30000	$15001~$30000
Yes	2016-05-19	Negative	Spanish	SPA3		Grindr	7	Yes	Yes	Yes	Yes	Yes	Yes	Yes	No	No	Yes	Yes	No	Sex (hook-up)		Yes	No	No	No	No	No	No	Yes	Yes	Yes	No	No		43	36-45	91767	Mexico	Mexico	Mexico	18	Associate degree	Associate degree		Working full time	Working full time		$20001-$25000	$15001~$30000
Yes	2016-05-19	Negative	English	SPA4		Growler	3								No	No	Yes	No	No	Boredom		No	No	No	No	Yes	No	No	No	Yes	No	No	No		37	36-45	91335	Mexico	Mexico	Mexico	11	Some college	Some college		Working part-time	Working part time		$5001-$10000	$0~$15000
Yes	2016-05-19	Negative	English	SPA7		Growler	7	Yes	Yes	Yes	Yes	Yes	Yes	Yes	Yes	Yes	No	No	Yes	Party and Play (sex and drugs)		Yes	No	No	No	Yes	No	No	No	Yes	Yes	No	No		40	36-45	90068	Mexico	United States	United States	N/A	Grade 12	Grade 12		Working full time	Working full time		$30001-$35000	More than $30000
Yes	2016-05-19	Negative	English	SPA7		Growler	7	Yes	Yes	Yes	Yes	Yes	Yes	Yes	No	Yes	No	Yes	Yes	Entertainment		Yes	No	No	No	Yes	No	Yes	No	Yes	Yes	No	No		28	26-35	90063	Mexico	Mexico	Mexico	2	Grade 12	Grade 12		Working part-time	Working part time		$10001-$15000	$0~$15000
Yes	2016-05-23	Negative	English	SPA3		Growler	5	No	Yes	Yes	No	Yes	Yes	Yes	Yes	Yes	Yes	Yes	Yes	Sex (hook-up)		Yes	No	No	No	Yes	Yes	Yes	No	Yes	No	No	No		23	18-25	91764	Mexico	United States	United States	N/A	Grade 12	Grade 12		Unemployed and looking for work	Unemployed and looking for work		$0-$5000	$0~$15000
Yes	2016-05-23	Negative	Spanish	SPA4		Grindr	4	Yes	Yes	Yes	No	No	No	Yes	No	No	Yes	No	Yes	Sex (hook-up)		No	No	No	No	No	No	Yes	Yes	Yes	No	No	No		48	46-55	91350	Mexico	Mexico	Mexico	19	Grade 12	Grade 12		Working full time	Working full time		$25001-$30000	$15001~$30000
Yes	2016-05-23	Negative	English	SPA4		Growler	7	Yes	Yes	Yes	Yes	Yes	Yes	Yes	No	No	No	No	Yes	Entertainment		Yes	No	No	No	No	No	No	No	Yes	Yes	No	No		40	36-45	91350	Mexico	Mexico	Mexico	24	Bachelor’s degree	Bachelor’s degree		Working full time	Working full time		$35001-$40000	More than $30000
Yes	2016-05-24	Negative	English	SPA3		Grindr	7	Yes	Yes	Yes	Yes	Yes	Yes	Yes	Yes	Yes	Yes	Yes	Yes	To meet someone		No	No	No	No	No	Yes	Yes	Yes	Yes	Yes	No	No		19	18-25	91766	Mexico (Father)	United States	United States	N/A	Grade 12	Grade 12		Working part-time	Working part time		$10001-$15000	$0~$15000
Yes	2016-05-25	Negative	Spanish	SPA4		Growler	3	Yes	No	No	Yes	Yes	No	No	No	No	No	No	Yes	Entertainment		Yes	No	No	No	No	No	No	No	Yes	Yes	No	No		55	46-55	91371	Mexico	Mexico	Mexico	30	Grade 12	Grade 12		Working full time	Working full time		More than $50000	More than $30000
Yes	2016-05-26	Negative	English	SPA3		Growler	7	Yes	Yes	Yes	Yes	Yes	Yes	Yes	No	No	Yes	Yes	Yes	To meet someone		Yes	No	No	No	No	No	No	Yes	Yes	Yes	No	No		34	26-35	91745	Mexico	United States	United States	N/A	Grade 12	Grade 12		Working full time	Working full time		$0-$5000	$0~$15000
No	2016-05-26	Negative	Spanish	SPA3		Growler	7	Yes	Yes	Yes	Yes	Yes	Yes	Yes	No	No	Yes	Yes	Yes	Friendship (to keep in touch, to see who is there)		Yes	No	No	No	Yes	Yes	Yes	No	Yes	No	No	No		38	36-45	91761	Mexico	Mexico	Mexico	36	Bachelor’s degree	Bachelor’s degree		Unemployed and looking for work	Unemployed and looking for work		$0-$5000	$0~$15000
Yes	2016-05-26	Negative	English	SPA7		Growler	2	No	No	No	No	No	Yes	Yes	No	No	Yes	No	No	Sex (hook-up)		No	No	No	No	Yes	No	No	No	Yes	Yes	No	No		47	46-55	90241	Mexico	United States	United States	N/A	Some college	Some college		Working full time	Working full time		More than $50000	More than $30000
Yes	2016-05-26	Negative	English	SPA7		Growler	7	Yes	Yes	Yes	Yes	Yes	Yes	Yes	Yes	Yes	Yes	Yes	Yes	Entertainment		No	No	No	No	Yes	No	No	No	No	No	No	No		43	36-45	90063	Mexico	Mexico	Mexico	4	Grade 12	Grade 12		Unemployed and looking for work	Unemployed and looking for work		More than $50000	More than $30000
Yes	2016-05-27	Negative	English	SPA4		Grindr	7	Yes	Yes	Yes	Yes	Yes	Yes	Yes	No	No	Yes	No	No	Entertainment		No	No	No	No	Yes	Yes	Yes	No	Yes	Yes	No	No		30	26-35	90057	Puerto Rico and Mexico	United States	United States	N/A	Associate degree	Associate degree		Other (e.g. student, day laborer)	Other (e.g. student, day laborer)	Temporarily not looking for work	$45001-$50000	More than $30000
Yes	2016-05-27	Negative	English	SPA7		Growler	7	Yes	Yes	Yes	Yes	Yes	Yes	Yes	No	No	Yes	Yes	Yes	Boredom		Yes	No	No	No	No	No	No	No	No	Yes	No	No		28	26-35	90032	Mexico	United States	United States	N/A	Associate degree	Associate degree		Working part-time	Working part time		$25001-$30000	$15001~$30000
Yes	2016-05-27	Negative	English	SPA7		Growler	7	Yes	Yes	Yes	Yes	Yes	Yes	Yes	No	No	Yes	Yes	No	Entertainment		No	No	No	No	No	No	Yes	No	No	No	No	No		25	18-25	90640	Mexico/El Salvador	United States	United States	N/A	Some college	Some college		Working full time	Working full time		$15001-$20000	$15001~$30000
Yes	2016-05-31	Positive	English	SPA3		Growler	7	Yes	Yes	Yes	Yes	Yes	Yes	Yes	Yes	Yes	Yes	Yes	Yes	Sex (hook-up)		No	No	No	No	Yes	No	Yes	Yes	No	Yes	No	No		21	18-25	91750	Mexico (Mother) Guatemala (Father)	United States	United States	N/A	Grade 12	Grade 12		Working part-time	Working part time		$5001-$10000	$0~$15000
Yes	2016-05-31	Negative	English	SPA3		Jack'd	7	Yes	Yes	Yes	Yes	Yes	Yes	Yes	Yes	Yes	Yes	Yes	Yes	Sex (hook-up)		Yes	No	No	No	No	Yes	No	Yes	Yes	Yes	No	No		29	26-35	90631	Dominican Republic (Mother)	United States	United States	N/A	Bachelor’s degree	Bachelor’s degree		Unemployed and looking for work	Unemployed and looking for work		$10001-$15000	$0~$15000
Yes	2016-06-01	Negative	Spanish	SPA4		Hornet	7	Yes	Yes	Yes	Yes	Yes	Yes	Yes	Yes	Yes	Yes	Yes	Yes	Party and Play (sex and drugs)		No	No	No	No	Yes	No	Yes	Yes	No	No	No	No		29	26-35	90004	El Salvador	El Salvador	Other	18	Grade 12	Grade 12		Working full time	Working full time		$20001-$25000	$15001~$30000
Yes	2016-06-01	Negative	English	SPA4		Growler	7	Yes	Yes	Yes	Yes	Yes	Yes	Yes	No	No	No	No	Yes	Entertainment		Yes	No	No	No	No	No	Yes	No	Yes	No	No	No		43	36-45	90015	Mexico	Mexico	Mexico	31	GED	GED		Unemployed and looking for work	Unemployed and looking for work		$15001-$20000	$15001~$30000
Yes	2016-06-02	Negative	English	SPA7		Growler	7	Yes	Yes	Yes	Yes	Yes	Yes	Yes	No	Yes	Yes	No	Yes	Boredom		Yes	No	No	No	No	Yes	No	Yes	No	Yes	No	No		28	26-35	90222	Mexico	United States	United States	N/A	Grade 12	Grade 12		Working part-time	Working part time		$0-$5000	$0~$15000
Yes	2016-06-03	Negative	English	SPA7		Growler	2	No	No	No	No	No	Yes	Yes	Yes	Yes	Yes	Yes	Yes	Boredom		No	No	No	No	No	No	No	Yes	No	No	No	No		34	26-35	90011	Nicaragua	Nicaragua	Other	3	Bachelor’s degree	Bachelor’s degree		Working full time	Working full time		$30001-$35000	More than $30000
Yes	2016-06-06	Negative	English	SPA3		Growler	2	No	No	No	No	No	Yes	Yes	No	No	No	No	Yes	To meet someone		Yes	Yes	No	No	Yes	Yes	Yes	No	Yes	Yes	No	No		39	36-45	92337	Mexico	United States	United States	N/A	Some college	Some college		Unemployed and looking for work	Unemployed and looking for work		$25001-$30000	$15001~$30000
Yes	2016-06-07	Negative	English	SPA4		Growler	7	Yes	Yes	Yes	Yes	Yes	Yes	Yes	Yes	Yes	Yes	Yes	Yes	Sex (hook-up)		No	No	No	No	Yes	Yes	No	No	Yes	Yes	No	No		28	26-35	90021	Mexico	United States	United States	N/A	Grade 12	Grade 12		Disabled and not working	Disabled and not working		$0-$5000	$0~$15000
Yes	2016-06-09	Negative	English	SPA3		Growler	7	Yes	Yes	Yes	Yes	Yes	Yes	Yes	No	No	Yes	No	No	Sex (hook-up)		Yes	No	No	No	No	Yes	Yes	No	No	Yes	No	No		22	18-25	91762	Mexico	United States	United States	N/A	Some college	Some college		Other (e.g. student, day laborer)	Other (e.g. student, day laborer)	Student	$0-$5000	$0~$15000
Yes	2016-06-10	Negative	English	SPA4		Hornet	7	Yes	Yes	Yes	Yes	Yes	Yes	Yes	No	Yes	Yes	Yes	Yes	Boredom		Yes	No	No	No	Yes	No	No	Yes	Yes	Yes	No	No		23	18-25	90250	Mexico	United States	United States	N/A	Bachelor’s degree	Bachelor’s degree		Working full time	Working full time		$15001-$20000	$15001~$30000
Yes	2016-06-14	Negative	English	SPA4		Growler	7	Yes	Yes	Yes	Yes	Yes	Yes	Yes	No	Yes	Yes	Yes	Yes	Boredom		No	No	No	No	Yes	No	No	Yes	Yes	Yes	No	No		29	26-35	90017	Guatemala	United States	United States	N/A	Other	Other	Technical degree & Some college	Working full time	Working full time		$30001-$35000	More than $30000
Yes	2016-06-15	Negative	English	SPA4		Growler	7	Yes	Yes	Yes	Yes	Yes	Yes	Yes	Yes	No	No	No	Yes	Sex (hook-up)		No	No	No	No	No	No	Yes	No	No	No	No	No		26	26-35	90003	Mexico	United States	United States	N/A	Some college	Some college		Working part-time	Working part time		$10001-$15000	$0~$15000
Yes	2016-06-16	Negative	English	SPA7		Growler	7	Yes	Yes	Yes	Yes	Yes	Yes	Yes	No	Yes	Yes	Yes	No	Boredom		Yes	No	No	No	No	No	No	Yes	No	No	No	No		58	56-65	91755	Mexico	United States	United States	N/A	Some college	Some college		Working part-time	Working part time		More than $50000	More than $30000
Yes	2016-06-20	Negative	English	SPA3		Growler	4	No	No	Yes	No	Yes	Yes	Yes	No	No	No	Yes	Yes	Entertainment		Yes	No	No	No	No	No	Yes	No	No	Yes	No	No		23	18-25	91767	Mexico	United States	United States	N/A	Technical degree	Technical degree		Working full time	Working full time		$25001-$30000	$15001~$30000
Yes	2016-06-21	Negative	English	SPA4		Growler	7	Yes	Yes	Yes	Yes	Yes	Yes	Yes	No	No	No	Yes	Yes	Sex (hook-up)		No	No	No	No	No	No	No	No	No	Yes	No	No		28	26-35	90001	Mexico (Mom only)	United States	United States	N/A	Grade 12	Grade 12		Working full time	Working full time		More than $50000	More than $30000
Yes	2016-06-21	Negative	English	SPA4		Jack'd	2	No	No	No	No	No	Yes	Yes	No	No	No	Yes	Yes	To meet someone		No	No	No	No	No	No	No	Yes	Yes	No	Yes	No		36	36-45	90019	Mexico	United States	United States	N/A	Grade 12	Grade 12		Unemployed and not looking for work	Unemployed and not looking for work		$0-$5000	$0~$15000
No	2016-06-21	Negative	English	SPA7		Grindr	4	No	Yes	Yes	No	No	Yes	Yes	No	No	No	Yes	Yes	Sex (hook-up)		No	No	No	No	Yes	No	No	Yes	No	No	No	No		29	26-35	91801	Mexico	United States	United States	N/A	Bachelor’s degree	Bachelor’s degree		Working full time	Working full time		$40001-$45000	More than $30000
Yes	2016-06-22	Negative	English	SPA4		Grindr	4	Yes	No	Yes	No	Yes	Yes	No	No	No	No	Yes	Yes	Entertainment		Yes	No	No	No	No	No	Yes	No	Yes	Yes	No	No		34	26-35	90262	El Salvador (mom), Honduras (dad)	United States	United States	N/A	Some college	Some college		Unemployed and looking for work	Unemployed and looking for work		$0-$5000	$0~$15000
Yes	2016-06-22	Negative	English	SPA7		Jack'd	7	Yes	Yes	Yes	Yes	Yes	Yes	Yes	Yes	Yes	Yes	Yes	Yes	Sex (hook-up)		No	No	No	No	Yes	Yes	Yes	Yes	Yes	No	No	No		24	18-25	90640	Mexico/El Salvador	United States	United States	N/A	Bachelor’s degree	Bachelor’s degree		Working part-time	Working part time		$10001-$15000	$0~$15000
Yes	2016-06-23	Positive	English	SPA4		Jack'd	5	Yes	Yes	No	No	Yes	Yes	Yes	No	No	No	Yes	Yes	Entertainment		No	No	No	No	Yes	Yes	Yes	No	Yes	No	No	Yes		52	46-55	90016	Mexico	United States	United States	N/A	Some college	Some college		Working part-time	Working part time		$10001-$15000	$0~$15000
Yes	2016-06-23	Negative	English	SPA4		Grindr	7	Yes	Yes	Yes	Yes	Yes	Yes	Yes	No	No	No	Yes	No	Sex (hook-up)		No	No	No	No	No	No	No	Yes	Yes	No	No	Yes	To chat with people	34	26-35	90017	Mexico	Mexico	Mexico	18	Bachelor’s degree	Bachelor’s degree		Unemployed and looking for work	Unemployed and looking for work		$10001-$15000	$0~$15000
Yes	2016-06-27	Negative	English	SPA3		Growler	7	Yes	Yes	Yes	Yes	Yes	Yes	Yes	Yes	No	No	No	Yes	To meet someone		Yes	No	No	No	No	No	Yes	Yes	Yes	No	No	No		21	18-25	92377	Mexico	United States	United States	N/A	Grade 12	Grade 12		Working full time	Working full time		$10001-$15000	$0~$15000
Yes	2016-06-28	Negative	English	SPA4		Growler	3	No	No	No	No	Yes	Yes	Yes	No	No	Yes	No	No	Boredom		Yes	No	No	No	No	No	No	No	No	No	No	No		19	18-25	90006	Guatemala	United States	United States	N/A	Grade 12	Grade 12		Working part-time	Working part time		$0-$5000	$0~$15000
Yes	2016-06-29	Negative	English	SPA3		Grindr	7	Yes	Yes	Yes	Yes	Yes	Yes	Yes	Yes	Yes	Yes	Yes	Yes	Sex (hook-up)		Yes	No	No	No	Yes	No	Yes	Yes	Yes	Yes	No	No		50	46-55	91016	Mexico	United States	United States	N/A	Grade 12	Grade 12		Working full time	Working full time		$35001-$40000	More than $30000
No	2016-06-29	Negative	English	SPA4		Growler	3	No	No	No	No	Yes	Yes	Yes	No	No	Yes	No	No	To meet someone		No	No	No	No	No	No	Yes	Yes	Yes	Yes	No	No		26	26-35	90038	Mexico	United States	United States	N/A	Some college	Some college		Other (e.g. student, day laborer)	Other (e.g. student, day laborer)	Working two jobs	$15001-$20000	$15001~$30000
Yes	2016-06-29	Negative	English	SPA4		Grindr	7	Yes	Yes	Yes	Yes	Yes	Yes	Yes	No	No	Yes	No	No	Boredom		Yes	No	No	No	Yes	No	No	Yes	Yes	No	No	No		23	18-25	90004	Nicaragua	Nicaragua	Other	1	Bachelor’s degree	Bachelor’s degree		Working full time	Working full time		$35001-$40000	More than $30000
Yes	2016-07-05	Negative	English	SPA4		Grindr	6	Yes	Yes	Yes	Yes	Yes	Yes	No	No	Yes	Yes	Yes	No	Friendship (to keep in touch, to see who is there)		Yes	No	No	No	No	Yes	Yes	Yes	No	No	No	No		30	26-35	90277	Mexico	Mexico	Mexico	5	Grade 12	Grade 12		Other (e.g. student, day laborer)	Other (e.g. student, day laborer)	Freelance worker: Photographer	$25001-$30000	$15001~$30000
Yes	2016-07-06	Negative	English	SPA7		Growler	7	Yes	Yes	Yes	Yes	Yes	Yes	Yes	No	No	No	Yes	Yes	To meet someone		Yes	No	No	No	No	No	Yes	No	No	Yes	No	No		54	46-55	90023	Mexico	Mexico	Mexico	2	Other	Other	Master's Degree	Working full time	Working full time		More than $50000	More than $30000
Yes	2016-07-07	Negative	Spanish	SPA3		Growler	7	Yes	Yes	Yes	Yes	Yes	Yes	Yes	No	No	Yes	Yes	Yes	To meet someone		Yes	No	No	No	No	No	Yes	No	No	Yes	No	No		35	26-35	91786	Mexico	Mexico	Mexico	31	Bachelor’s degree	Bachelor’s degree		Working full time	Working full time		$30001-$35000	More than $30000
Yes	2016-07-11	Negative	English	SPA4		Growler	4	Yes	No	Yes	No	No	Yes	Yes	No	Yes	Yes	Yes	No	To meet someone		No	No	No	No	Yes	No	Yes	No	No	No	No	No		38	36-45	90011	Mexico	United States	United States	N/A	Associate degree	Associate degree		Working full time	Working full time		$35001-$40000	More than $30000
Yes	2016-07-14	Negative	English	SPA4		Grindr	7	Yes	Yes	Yes	Yes	Yes	Yes	Yes	No	No	No	Yes	No	Sex (hook-up)		No	No	No	No	Yes	No	Yes	Yes	Yes	Yes	No	No		18	18-25	90019	Mexico	United States	United States	N/A	Grade 12	Grade 12		Unemployed and looking for work	Unemployed and looking for work		$0-$5000	$0~$15000
Yes	2016-07-14	Negative	English	SPA7		Growler	7	Yes	Yes	Yes	Yes	Yes	Yes	Yes	No	Yes	Yes	No	No	Entertainment		Yes	No	No	No	No	No	Yes	No	No	Yes	No	No		36	36-45	90040	Mexico	United States	United States	N/A	Technical degree	Technical degree		Working full time	Working full time		$25001-$30000	$15001~$30000
Yes	2016-07-15	Negative	English	SPA7		Growler	7	Yes	Yes	Yes	Yes	Yes	Yes	Yes	Yes	No	Yes	Yes	Yes	Boredom		Yes	No	No	No	Yes	No	No	No	Yes	Yes	No	No		32	26-35	90033	Mexico	United States	United States	N/A	Some college	Some college		Working part-time	Working part time	Two part-time jobs	$20001-$25000	$15001~$30000
Yes	2016-07-18	Negative	English	SPA4		Growler	4	No	No	Yes	No	Yes	Yes	Yes	No	No	No	Yes	No	Sex (hook-up)		No	No	No	No	Yes	Yes	Yes	Yes	Yes	Yes	No	No		27	26-35	90003	El Salvador (Mom), Mexico (Dad)	United States	United States	N/A	Grade 12	Grade 12		Working part-time	Working part time		$0-$5000	$0~$15000
Yes	2016-07-20	Negative	English	SPA4		Grindr	7	Yes	Yes	Yes	Yes	Yes	Yes	Yes	No	Yes	No	No	No	Friendship (to keep in touch, to see who is there)		No	No	No	No	No	No	Yes	Yes	No	No	No	Yes	To hang out	26	26-35	90065	Mexico	United States	United States	N/A	Grade 12	Grade 12		Working part-time	Working part time		$25001-$30000	$15001~$30000
Yes	2016-07-21	Negative	English	SPA7		Growler	5	Yes	Yes	Yes	Yes	Yes	Yes	Yes	Yes	No	Yes	Yes	Yes	Dating		Yes	No	No	No	No	No	Yes	Yes	Yes	No	No	No		32	26-35	90044	Mexico	United States	United States	N/A	Grade 12	Grade 12		Working part-time	Working part time		$5001-$10000	$0~$15000
Yes	2016-07-21	Negative	Spanish	SPA7		Grindr	7	Yes	Yes	Yes	Yes	Yes	Yes	Yes	No	No	No	Yes	No	Dating		No	No	No	No	No	No	No	No	Yes	Yes	No	No		47	46-55	90255	El Salvador	El Salvador	Other	44	Grade 12	Grade 12		Working full time	Working full time		$10001-$15000	$0~$15000
Yes	2016-07-22	Negative	English	SPA7		Growler	7	Yes	Yes	Yes	Yes	Yes	Yes	Yes	No	Yes	No	Yes	Yes	Dating		No	No	No	No	No	No	Yes	No	Yes	No	No	Yes	Long Term Relationship	27	26-35	90022	Mexico	United States	United States	N/A	Some college	Some college		Working full time	Working full time		$20001-$25000	$15001~$30000
No	2016-07-26	Negative	English	SPA7		Grindr	7	Yes	Yes	Yes	Yes	Yes	Yes	Yes	Yes	Yes	Yes	Yes	Yes	Entertainment		Yes	No	No	No	No	No	Yes	No	No	No	No	No		28	26-35	90022	Mexico	United States	United States	N/A	Associate degree	Associate degree		Working part-time	Working part time		$15001-$20000	$15001~$30000
Yes	2016-07-27	Positive	English	SPA3		Growler	7	Yes	Yes	Yes	Yes	Yes	Yes	Yes	Yes	Yes	Yes	Yes	Yes	To meet someone		Yes	No	No	No	No	Yes	No	No	Yes	Yes	No	No		31	26-35	92879	Mexico	Mexico	Mexico	1	Some college	Some college		Working part-time	Working part time		$15001-$20000	$15001~$30000
Yes	2016-07-27	Negative	English	SPA4			3	No	No	No	No	Yes	Yes	Yes	No	No	No	Yes	No	Boredom		Yes	No	No	No	No	No	No	No	Yes	Yes	No	No		39	36-45	90026	Mexico	Mexico	Mexico	7	Grades 9 through 11	Grades 9 through 11		Working part-time	Working part time		$20001-$25000	$15001~$30000
Yes	2016-07-27	Negative	English	SPA4		Grindr	7	Yes	Yes	Yes	Yes	Yes	Yes	Yes	No	Yes	No	Yes	No	Boredom		Yes	No	No	No	No	No	No	No	No	Yes	No	No		38	36-45	90028	Mexico	Mexico	Mexico	20	Grade 12	Grade 12		Unemployed and looking for work	Unemployed and looking for work		$10001-$15000	$0~$15000
Yes	2016-07-27	Negative	English	SPA4		Jack'd	7	Yes	Yes	Yes	Yes	Yes	Yes	Yes	No	No	Yes	Yes	Yes	Sex (hook-up)		No	No	No	No	No	No	No	No	Yes	No	No	No		49	46-55	90026	Puerto Rico	United States	United States	N/A	Bachelor’s degree	Bachelor’s degree		Working full time	Working full time		More than $50000	More than $30000
Yes	2016-07-27	Negative	English	SPA7		Growler	7	Yes	Yes	Yes	Yes	Yes	Yes	Yes	Yes	Yes	Yes	Yes	Yes	Loneliness		Yes	No	No	No	No	No	Yes	No	Yes	Yes	No	No		54	46-55	90640	Mexico	United States	United States	N/A	Grade 12	Grade 12		Unemployed and not looking for work	Unemployed and not looking for work		$0-$5000	$0~$15000
Yes	2016-07-27	Negative	English	SPA7		Growler	7	Yes	Yes	Yes	Yes	Yes	Yes	Yes	No	Yes	Yes	Yes	Yes	Other	Chat	No	No	No	No	No	No	Yes	Yes	No	No	No	No		26	26-35	91342	Mexico	United States	United States	N/A	Some college	Some college		Working full time	Working full time		$40001-$45000	More than $30000
Yes	2016-07-27	Negative	English	SPA7		Jack'd	4	No	No	Yes	No	Yes	Yes	Yes	No	No	Yes	Yes	Yes	To meet someone		Yes	No	No	No	Yes	Yes	No	No	No	No	No	No		29	26-35	90063	Mexico/El Salvador	United States	United States	N/A	Grade 12	Grade 12		Working full time	Working full time		$25001-$30000	$15001~$30000
Yes	2016-08-02	Negative	English	SPA3		Growler	3	Yes	No	Yes	No	Yes	No	No	No	No	Yes	Yes	No	Friendship (to keep in touch, to see who is there)		Yes	No	No	No	No	No	Yes	No	No	No	No	No		41	36-45	92410	Mexico	United States	United States	N/A	Grades 9 through 11	Grades 9 through 11		Working full time	Working full time		$40001-$45000	More than $30000
Yes	2016-08-02	Negative	English	SPA4		Jack'd	1	No	No	Yes	No	No	No	No	No	No	Yes	No	No	Boredom		No	No	No	No	No	Yes	No	No	No	No	No	No		28	26-35	90710	Mexico	United States	United States	N/A	Some college	Some college		Unemployed and looking for work	Unemployed and looking for work		$5001-$10000	$0~$15000
Yes	2016-08-03	Negative	English	SPA4		Grindr	7	Yes	Yes	Yes	Yes	Yes	Yes	Yes	Yes	No	Yes	Yes	Yes	To meet someone		Yes	No	No	No	Yes	No	Yes	Yes	No	Yes	No	No		23	18-25	90007	Ecuador/Colombia	Ecuador	Other	5	Some college	Some college		Working part-time	Working part time		$15001-$20000	$15001~$30000
Yes	2016-08-03	Negative	English	SPA4		Growler	7	Yes	Yes	Yes	Yes	Yes	Yes	Yes	Yes	No	Yes	Yes	Yes	Sex (hook-up)		No	No	No	No	No	Yes	No	Yes	Yes	Yes	No	No		62	56-65	90005	Mexico			N/A	Some college	Some college		Retired and not working	Retired and not working		$15001-$20000	$15001~$30000
Yes	2016-08-03	Negative	English	SPA4		Jack'd	2	No	No	No	No	No	Yes	Yes	No	Yes	Yes	Yes	No	Boredom		Yes	No	No	No	No	Yes	Yes	Yes	Yes	Yes	No	No		39	36-45	91331	Mexico	United States	United States	N/A	Associate degree	Associate degree		Working full time	Working full time		$15001-$20000	$15001~$30000
Yes	2016-08-04	Negative	English	SPA7		Grindr	3	No	No	No	No	Yes	Yes	Yes	No	No	No	Yes	Yes	Sex (hook-up)		No	No	No	No	Yes	No	Yes	No	No	Yes	No	No		26	26-35	90011	Mexico/Dominican Republic	United States	United States	N/A	Bachelor’s degree	Bachelor’s degree		Working part-time	Working part time		$35001-$40000	More than $30000
Yes	2016-08-05	Negative	English	SPA7		Grindr	7	Yes	Yes	Yes	Yes	Yes	Yes	Yes	Yes	Yes	Yes	Yes	Yes	Sex (hook-up)		No	No	No	No	No	No	No	No	No	No	No	Yes	Chat	32	26-35	91754	Mexico	United States	United States	N/A	Grade 12	Grade 12		Working part-time	Working part time		$10001-$15000	$0~$15000
Yes	2016-08-08	Negative	English	SPA4		Grindr	6	No	Yes	Yes	Yes	Yes	Yes	Yes	Yes	Yes	Yes	Yes	Yes	Friendship (to keep in touch, to see who is there)		No	No	No	No	No	Yes	Yes	No	Yes	No	No	No		37	36-45	90038	Mexico	United States	United States	N/A	Bachelor’s degree	Bachelor’s degree		Unemployed and looking for work	Unemployed and looking for work		$25001-$30000	$15001~$30000
Yes	2016-08-10	Negative	English	SPA4		Grindr	7	Yes	Yes	Yes	Yes	Yes	Yes	Yes	No	No	No	Yes	No	Entertainment		Yes	No	No	No	No	No	No	No	Yes	No	No	No		37	36-45	90038	El Salvador	El Salvador	Other	3	Grade 12	Grade 12		Working full time	Working full time		$20001-$25000	$15001~$30000
Yes	2016-08-18	Negative	English	SPA4	Yes	Grindr	7	Yes	Yes	Yes	Yes	Yes	Yes	Yes	Yes	Yes	Yes	Yes	Yes	Sex (hook-up)		No	No	No	No	Yes	Yes	Yes	No	Yes	No	No	No		24	18-25	90002	Honduras	United States	United States	N/A	Associate degree	Associate degree		Working full time	Working full time		$30001-$35000	More than $30000
Yes	2016-08-18	Negative	English	SPA4	Yes	Growler	7	Yes	Yes	Yes	Yes	Yes	Yes	Yes	No	No	Yes	Yes	Yes	Boredom		Yes	No	No	No	No	No	No	No	No	No	No	No		24	18-25	90059	Mexico	United States	United States	N/A	Some college	Some college		Working part-time	Working part time		$0-$5000	$0~$15000
Yes	2016-08-18	Negative	English	SPA7		Growler	7	Yes	Yes	Yes	Yes	Yes	Yes	Yes	No	Yes	Yes	Yes	No	Entertainment		Yes	No	No	No	No	No	No	No	No	No	No	No		49	46-55	90033	Mexico	United States	United States	N/A	Some college	Some college		Working full time	Working full time		$30001-$35000	More than $30000
Yes	2016-08-19	Negative	English	SPA4	Yes	Grindr	7	Yes	Yes	Yes	Yes	Yes	Yes	Yes	No	No	No	Yes	Yes	Boredom		Yes	No	No	No	Yes	Yes	No	Yes	Yes	Yes	No	No		29	26-35	90731	Honduras	Honduras	Other	9	Associate degree	Associate degree		Unemployed and not looking for work	Unemployed and not looking for work		$25001-$30000	$15001~$30000
Yes	2016-08-19	Negative	Spanish	SPA7		Hornet	1	No	Yes	No	No	No	No	No	Yes	No	No	No	Yes	Sex (hook-up)		No	No	No	No	No	No	Yes	Yes	Yes	No	No	No		39	36-45	90022	Mexico	Mexico	Mexico	18	Grade 12	Grade 12		Working part-time	Working part time		$15001-$20000	$15001~$30000
Yes	2016-08-22	Negative	English	SPA3	Yes	Jack'd	7	Yes	Yes	Yes	Yes	Yes	Yes	Yes	No	Yes	Yes	No	Yes	Sex (hook-up)		No	No	No	No	No	No	Yes	No	Yes	Yes	No	No		34	26-35	90011	Mexico	Mexico	Mexico	19	Grade 12	Grade 12		Working part-time	Working part time		$10001-$15000	$0~$15000
Yes	2016-08-22	Negative	Spanish	SPA7	Yes	Grindr	7	Yes	Yes	Yes	Yes	Yes	Yes	Yes	No	No	No	Yes	No	Sex (hook-up)		No	Yes	No	No	No	No	No	Yes	Yes	No	No	No		51	46-55	90011	El Salvador	El Salvador	Other	21	Grades 9 through 11	Grades 9 through 11		Working full time	Working full time		$0-$5000	$0~$15000
Yes	2016-08-23	Negative	English	SPA3	Yes	Growler	7	Yes	Yes	Yes	Yes	Yes	Yes	Yes	No	Yes	Yes	No	Yes	Friendship (to keep in touch, to see who is there)		Yes	No	No	No	No	No	Yes	No	No	No	No	No		27	26-35	91764	Mexico	United States	United States	N/A	Some college	Some college		Working part-time	Working part time		$0-$5000	$0~$15000
Yes	2016-08-23	Negative	English	SPA7	Yes	Growler	7	Yes	Yes	Yes	Yes	Yes	Yes	Yes	No	Yes	Yes	Yes	Yes	Friendship (to keep in touch, to see who is there)		Yes	No	No	No	Yes	No	No	Yes	No	No	No	No		42	36-45	90640	Mexico/Colombia	United States	United States	N/A	Bachelor’s degree	Bachelor’s degree		Working part-time	Working part time		$10001-$15000	$0~$15000
Yes	2016-08-24	Negative	Spanish	SPA3	Yes	Grindr	7	Yes	Yes	Yes	Yes	Yes	Yes	Yes	No	No	Yes	Yes	No	Boredom		No	No	No	No	Yes	No	No	Yes	Yes	Yes	Yes	No		33	26-35	91706	Honduras	Honduras	Other	19	Grades 7 or 8	Grades 7 or 8		Working full time	Working full time		$35001-$40000	More than $30000
Yes	2016-08-24	Positive	English	SPA4	Yes	Grindr	2	Yes	No	No	No	Yes	No	No	No	No	Yes	No	No	Sex (hook-up)		No	No	No	No	No	No	No	Yes	No	No	No	No		32	26-35	90034	Dominican Republic and Barbados	United States	United States	N/A	Bachelor’s degree	Bachelor’s degree		Working part-time	Working part time		$15001-$20000	$15001~$30000
Yes	2016-08-24	Negative	English	SPA4	Yes	Grindr	7	Yes	Yes	Yes	Yes	Yes	Yes	Yes	No	Yes	No	Yes	Yes	Friendship (to keep in touch, to see who is there)		Yes	No	No	No	Yes	No	Yes	Yes	No	Yes	No	No		21	18-25	90046	Mexico	United States	United States	N/A	Some college	Some college		Other (e.g. student, day laborer)	Other (e.g. student, day laborer)	Freelance worker- Makes his own hours	$30001-$35000	More than $30000
Yes	2016-08-24	Negative	English	SPA4	Yes	Grindr	7	Yes	Yes	Yes	Yes	Yes	Yes	Yes	No	No	No	Yes	Yes	Sex (hook-up)		No	No	No	No	No	Yes	Yes	No	Yes	No	No	No		30	26-35	90007	Mexico	United States	United States	N/A	Some college	Some college		Working full time	Working full time		$25001-$30000	$15001~$30000
Yes	2016-08-24	Negative	Spanish	SPA4	Yes	Grindr	7	Yes	Yes	Yes	Yes	Yes	Yes	Yes	No	Yes	Yes	Yes	Yes	Boredom		No	No	No	No	No	No	No	Yes	No	No	No	No		45	36-45	90033	Mexico	Mexico	Mexico	24	Grade 12	Grade 12		Working full time	Working full time		$20001-$25000	$15001~$30000
No	2016-08-24	Negative	English	SPA7	Yes	Grindr	1	No	No	No	No	No	Yes	No	Yes	No	No	Yes	Yes	Loneliness		Yes	No	No	Yes	Yes	No	Yes	Yes	No	No	No	No		27	26-35	90304	Mexico	United States	United States	N/A	Some college	Some college		Working full time	Working full time		$15001-$20000	$15001~$30000
No	2016-08-24	Negative	English	SPA7	Yes	Grindr	7	Yes	Yes	Yes	Yes	Yes	Yes	Yes	Yes	Yes	Yes	Yes	Yes	Boredom		No	No	No	No	No	No	No	Yes	Yes	No	No	No		30	26-35	90250	Mexico	Mexico	Mexico	2	Grade 12	Grade 12		Working full time	Working full time		$0-$5000	$0~$15000
Yes	2016-08-25	Negative	English	SPA3	Yes	Grindr	1	No	No	No	No	No	No	Yes	No	Yes	No	Yes	No	Loneliness		Yes	No	No	No	No	No	No	No	Yes	Yes	No	No		34	26-35	91762	Mexico (Paternal Grandfather)	United States	United States	N/A	Some college	Some college		Working full time	Working full time		$35001-$40000	More than $30000
No	2016-08-26	Negative	English	SPA3	Yes	Growler	7	Yes	Yes	Yes	Yes	Yes	Yes	Yes	No	No	No	No	Yes	Sex (hook-up)		No	No	No	No	No	No	Yes	No	No	No	No	No		28	26-35	91767	Guatemala	Guatemala	Other	6	Bachelor’s degree	Bachelor’s degree		Unemployed and looking for work	Unemployed and looking for work		$10001-$15000	$0~$15000
Yes	2016-08-26	Negative	English	SPA3	Yes	Grindr	7	Yes	Yes	Yes	Yes	Yes	Yes	Yes	Yes	No	No	Yes	Yes	Sex (hook-up)		No	No	No	No	No	No	Yes	Yes	No	Yes	No	No		28	26-35	91764	Peru	United States	United States	N/A	Bachelor’s degree	Bachelor’s degree		Working part-time	Working part time		$20001-$25000	$15001~$30000
Yes	2016-08-29	Negative	English	SPA3	Yes	Jack'd	4	No	No	No	Yes	Yes	Yes	Yes	No	No	No	Yes	Yes	Sex (hook-up)		No	No	No	No	Yes	No	Yes	Yes	Yes	Yes	No	No		21	18-25	92801	Mexico	United States	United States	N/A	Grade 12	Grade 12		Working full time	Working full time		$20001-$25000	$15001~$30000
No	2016-08-30	Negative	English	SPA3	Yes	Growler	7	Yes	Yes	Yes	Yes	Yes	Yes	Yes	No	No	No	Yes	No	Loneliness		Yes	No	No	No	Yes	Yes	Yes	Yes	Yes	No	No	No		23	18-25	91762	Mexico	United States	United States	N/A	Bachelor’s degree	Bachelor’s degree		Working full time	Working full time		$15001-$20000	$15001~$30000
Yes	2016-08-31	Negative	English	SPA4	Yes	Jack'd	7	Yes	Yes	Yes	Yes	Yes	Yes	Yes	No	No	No	Yes	Yes	To meet someone		Yes	No	No	No	No	No	Yes	Yes	No	No	No	No		20	18-25	92801	Mexico	United States	United States	N/A	Some college	Some college		Working full time	Working full time		$5001-$10000	$0~$15000
Yes	2016-08-31	Negative	English	SPA4	Yes	Grindr	7	Yes	Yes	Yes	Yes	Yes	Yes	Yes	No	No	No	Yes	Yes	To meet someone		No	No	No	No	No	Yes	Yes	Yes	No	No	No	No		30	26-35	90038	Puerto Rico	United States	United States	N/A	Some college	Some college		Working full time	Working full time		$30001-$35000	More than $30000
No	2016-08-31	Negative	English	SPA7	Yes	Growler	4	Yes	Yes	Yes	Yes	No	No	No	Yes	No	No	No	Yes	Boredom		No	No	No	No	No	No	No	No	No	Yes	No	No		20	18-25	90040	Mexico	United States	United States	N/A	Grade 12	Grade 12		Working full time	Working full time		$30001-$35000	More than $30000
No	2016-08-31	Negative	English	SPA7	Yes	Growler	7	Yes	Yes	Yes	Yes	Yes	Yes	Yes	Yes	Yes	Yes	Yes	Yes	To meet someone		Yes	Yes	No	No	Yes	No	No	No	No	Yes	No	No		46	46-55	90650	Mexico	Mexico	Mexico	8	Grade 12	Grade 12		Unemployed and looking for work	Unemployed and looking for work		$10001-$15000	$0~$15000
Yes	2016-08-31	Negative	English	SPA7	Yes	Jack'd	7	Yes	Yes	Yes	Yes	Yes	Yes	Yes	No	Yes	Yes	Yes	Yes	Boredom		No	No	No	No	No	No	No	Yes	No	No	No	No		25	18-25	90640	Mexico	United States	United States	N/A	Bachelor’s degree	Bachelor’s degree		Working part-time	Working part time		$25001-$30000	$15001~$30000
No	2016-09-01	Negative	English	SPA7	Yes	Growler	7	Yes	Yes	Yes	Yes	Yes	Yes	Yes	Yes	No	Yes	Yes	Yes	Entertainment		Yes	No	No	No	Yes	No	Yes	No	Yes	Yes	No	No		28	26-35	90063	Mexico	Mexico	Mexico	2	Grade 12	Grade 12		Working part-time	Working part time		$10001-$15000	$0~$15000
Yes	2016-09-02	Negative	English	SPA3	Yes	Jack'd	7	Yes	Yes	Yes	Yes	Yes	Yes	Yes	No	No	Yes	Yes	No	Boredom		Yes	No	No	No	No	No	No	Yes	No	Yes	No	No		28	26-35	91766	Mexico (Father) El Salvador (Mother)	United States	United States	N/A	Some college	Some college		Unemployed and looking for work	Unemployed and looking for work		$10001-$15000	$0~$15000
No	2016-09-02	Negative	English	SPA3	Yes	Grindr	5	Yes	Yes	Yes	Yes	Yes	No	No	No	No	Yes	Yes	Yes	To meet someone		No	No	No	No	Yes	No	No	Yes	Yes	No	No	No		21	18-25	91767	Mexico	United States	United States	N/A	Technical degree	Technical degree		Working full time	Working full time		$5001-$10000	$0~$15000
Yes	2016-09-08	Negative	English	SPA4	Yes	Growler	3	No	No	No	No	Yes	Yes	Yes	No	Yes	Yes	Yes	Yes	Party and Play (sex and drugs)		Yes	No	No	No	No	No	No	Yes	No	No	No	Yes	To chat with people	26	26-35	90805	Mexico	Mexico	Mexico	1	Grades 7 or 8	Grades 7 or 8		Unemployed and looking for work	Unemployed and looking for work		$0-$5000	$0~$15000
Yes	2016-09-08	Negative	English	SPA4	Yes	Grindr	7	Yes	Yes	Yes	Yes	Yes	Yes	Yes	No	No	No	Yes	Yes	Dating		No	No	No	No	No	No	Yes	Yes	No	No	No	No		27	26-35	92592	Mexico	United States	United States	N/A	Bachelor’s degree	Bachelor’s degree		Working full time	Working full time		$30001-$35000	More than $30000
Yes	2016-09-08	Negative	English	SPA7	Yes	Grindr	5	No	No	Yes	Yes	Yes	Yes	Yes	Yes	No	No	Yes	No	Dating		No	No	No	No	No	No	No	No	Yes	Yes	No	No		23	18-25	90744	Mexico	United States	United States	N/A	Bachelor’s degree	Bachelor’s degree		Working part-time	Working part time	Intern	$0-$5000	$0~$15000
Yes	2016-09-09	Negative	English	SPA3	Yes	Grindr	3	No	Yes	No	No	Yes	Yes	No	No	No	No	Yes	No	Boredom		Yes	No	No	No	No	No	No	No	Yes	No	No	No		30	26-35	91744	Mexico	Mexico	Mexico	6	Some college	Some college		Working part-time	Working part time		$20001-$25000	$15001~$30000
Yes	2016-09-09	Negative	English	SPA4	Yes	Growler	4	No	No	No	Yes	Yes	Yes	Yes	No	No	No	Yes	Yes	To meet someone		Yes	No	No	No	No	No	Yes	Yes	No	Yes	No	No		26	26-35	90247	Mexican (Mom) and Black (Dad)	United States	United States	N/A	Some college	Some college		Working full time	Working full time		$25001-$30000	$15001~$30000
Yes	2016-09-09	Negative	English	SPA4	Yes	Grindr	4	No	No	No	Yes	Yes	Yes	Yes	No	No	No	Yes	Yes	Entertainment		Yes	No	No	No	No	Yes	No	No	Yes	Yes	No	No		22	18-25	90011	Mexico	United States	United States	N/A	Some college	Some college		Unemployed and not looking for work	Unemployed and not looking for work		$20001-$25000	$15001~$30000
Yes	2016-09-09	Negative	English	SPA7	Yes	Grindr	5	Yes	Yes	Yes	Yes	Yes	Yes	Yes	Yes	Yes	Yes	Yes	Yes	Entertainment		Yes	No	No	No	No	Yes	Yes	Yes	Yes	Yes	No	No		31	26-35	90022	Mexico	United States	United States	N/A	Some college	Some college		Working part-time	Working part time		$15001-$20000	$15001~$30000
Yes	2016-09-09	Negative	English	SPA7	Yes	Growler	2	No	No	Yes	No	No	Yes	No	No	No	No	Yes	Yes	Loneliness		No	No	No	No	No	No	Yes	No	Yes	Yes	No	No		27	26-35	97	Puerto Rico/ Panama	United States	United States	N/A	Associate degree	Associate degree		Other (e.g. student, day laborer)	Other (e.g. student, day laborer)	Freelance work	$20001-$25000	$15001~$30000
No	2016-09-12	Negative	English	SPA7	Yes	Grindr	7	Yes	Yes	Yes	Yes	Yes	Yes	Yes	Yes	Yes	Yes	Yes	Yes	Friendship (to keep in touch, to see who is there)		No	No	No	No	No	No	No	Yes	Yes	No	No	No		21	18-25	91702	Mexico	Mexico	Mexico	4	Grade 12	Grade 12		Working part-time	Working part time		$0-$5000	$0~$15000
Yes	2016-09-13	Negative	English	SPA7	Yes	Growler	7	Yes	Yes	Yes	Yes	Yes	Yes	Yes	No	Yes	Yes	Yes	Yes	Sex (hook-up)		No	No	No	No	Yes	No	Yes	No	No	No	No	No		20	18-25	90001	Mexico	United States	United States	N/A	Some college	Some college		Working full time	Working full time		$5001-$10000	$0~$15000
Yes	2016-09-15	Negative	English	SPA4	Yes	Grindr	7	Yes	Yes	Yes	Yes	Yes	Yes	Yes	Yes	Yes	Yes	Yes	Yes	Sex (hook-up)		No	No	No	No	No	No	Yes	No	Yes	Yes	No	No		36	36-45	91607	Colombia	Colombia	Other	19	Associate degree	Associate degree		Unemployed and not looking for work	Unemployed and not looking for work		$0-$5000	$0~$15000
No	2016-09-15	Negative	English	SPA7	Yes	Growler	2	Yes	Yes	Yes	Yes	Yes	Yes	Yes	Yes	Yes	No	No	No	Boredom		Yes	No	No	No	No	No	No	No	No	No	No	No		34	26-35	90011	Nicaragua	Nicaragua	Other	2	Bachelor’s degree	Bachelor’s degree		Working full time	Working full time		$35001-$40000	More than $30000
Yes	2016-09-17	Negative	English	SPA4	Yes	Grindr	7	Yes	Yes	Yes	Yes	Yes	Yes	Yes	No	No	No	Yes	No	Entertainment		Yes	No	No	No	No	No	Yes	No	No	No	No	No		34	26-35	91326	Mexico	United States	United States	N/A	Some college	Some college		Working full time	Working full time		$45001-$50000	More than $30000
Yes	2016-09-17	Negative	Spanish	SPA4	Yes	Grindr	7	Yes	Yes	Yes	Yes	Yes	Yes	Yes	No	No	No	Yes	Yes	Sex (hook-up)		Yes	No	No	No	No	No	No	No	No	No	No	No		53	46-55	90062	Guatemala	Guatemala	Other	26	Grades 1 through 6	Grades 1 through 6		Working full time	Working full time		$40001-$45000	More than $30000
Yes	2016-09-17	Positive	Spanish	SPA4	Yes	Grindr	5	Yes	Yes	Yes	Yes	Yes	No	No	No	No	No	Yes	Yes	Entertainment		No	No	No	No	No	No	No	No	Yes	No	No	No		50	46-55	91606	Mexico	Mexico	Mexico	40	Grades 9 through 11	Grades 9 through 11		Working part-time	Working part time		$10001-$15000	$0~$15000
Yes	2016-09-17	Negative	English	SPA4	Yes	Growler	7	Yes	Yes	Yes	Yes	Yes	Yes	Yes	No	No	Yes	Yes	No	Sex (hook-up)		No	No	No	No	No	No	No	No	No	Yes	No	No		22	18-25	91325	Mexico	United States	United States	N/A	Some college	Some college		Unemployed and not looking for work	Unemployed and not looking for work		$5001-$10000	$0~$15000
Yes	2016-09-20	Negative	English	SPA3	Yes	Growler	3	Yes	No	Yes	No	Yes	No	No	No	No	Yes	No	Yes	Entertainment		Yes	No	No	No	No	No	Yes	Yes	No	Yes	No	No		30	26-35	92376	Mexico	United States	United States	N/A	Associate degree	Associate degree		Working full time	Working full time		$15001-$20000	$15001~$30000
Yes	2016-09-21	Positive	English	SPA4	Yes	Jack'd	5	Yes	No	Yes	No	Yes	Yes	Yes	Yes	No	No	No	Yes	To meet someone		Yes	No	No	No	Yes	No	Yes	Yes	No	Yes	No	No		25	18-25	90019	Mexico (his mother)	United States	United States	N/A	Some college	Some college		Working full time	Working full time		$20001-$25000	$15001~$30000
Yes	2016-09-21	Negative	English	SPA7	Yes	Jack'd	7	No	No	No	No	No	Yes	Yes	No	Yes	Yes	Yes	Yes	To meet someone		Yes	No	No	No	Yes	No	No	No	No	Yes	No	No		31	26-35	90022	Mexico	United States	United States	N/A	Some college	Some college		Working full time	Working full time		$30001-$35000	More than $30000
Yes	2016-09-22	Negative	English	SPA4	Yes	Grindr	4	No	No	No	Yes	Yes	Yes	Yes	No	No	Yes	Yes	Yes	Friendship (to keep in touch, to see who is there)		No	No	No	No	Yes	No	Yes	No	Yes	No	No	No		23	18-25	90006	Guatemala (father), Mexico (Mother)	United States	United States	N/A	Some college	Some college		Working part-time	Working part time		$35001-$40000	More than $30000
Yes	2016-09-22	Negative	English	SPA4	Yes		7	Yes	Yes	Yes	Yes	Yes	Yes	Yes	No	No	No	Yes	Yes	To meet someone		Yes	No	No	No	No	Yes	Yes	Yes	No	Yes	No	No		23	18-25	90027	Mexico	United States	United States	N/A	Grade 12	Grade 12		Unemployed and looking for work	Unemployed and looking for work		$5001-$10000	$0~$15000
Yes	2016-09-23	Negative	English	SPA3	Yes	Grindr	4	No	No	No	Yes	Yes	Yes	Yes	No	No	No	No	Yes	Boredom		Yes	No	No	No	No	No	No	No	No	Yes	No	No		28	26-35	91107	Mexico	United States	United States	N/A	Associate degree	Associate degree		Working part-time	Working part time		$10001-$15000	$0~$15000
Yes	2016-09-23	Negative	English	SPA4	Yes		4	No	No	Yes	No	Yes	Yes	Yes	No	No	No	Yes	Yes	Boredom		Yes	No	No	No	Yes	No	No	No	Yes	Yes	No	No		43	36-45	90028	Mexico	Mexico	Mexico	7	Grade 12	Grade 12		Unemployed and not looking for work	Unemployed and not looking for work		$35001-$40000	More than $30000
Yes	2016-09-23	Negative	English	SPA4	Yes	Grindr	3	No	Yes	Yes	Yes	No	No	No	No	No	Yes	Yes	No	Sex (hook-up)		No	No	No	No	No	No	Yes	No	No	No	No	No		23	18-25	90033	Mexico	United States	United States	N/A	Grade 12	Grade 12		Working part-time	Working part time		$20001-$25000	$15001~$30000
Yes	2016-09-23	Negative	English	SPA4	Yes	Grindr	7	Yes	Yes	Yes	Yes	Yes	Yes	Yes	No	No	Yes	Yes	Yes	Sex (hook-up)		No	No	No	No	Yes	No	Yes	Yes	Yes	Yes	No	No		43	36-45	90064	El Salvador	El Salvador	Other	14	Grade 12	Grade 12		Unemployed and looking for work	Unemployed and looking for work		$40001-$45000	More than $30000
Yes	2016-09-24	Negative	English	SPA4	Yes	Growler	7	Yes	Yes	Yes	Yes	Yes	Yes	Yes	No	Yes	Yes	Yes	Yes	Friendship (to keep in touch, to see who is there)		Yes	No	No	No	Yes	Yes	Yes	No	Yes	No	No	No		21	18-25	97	Mexico	United States	United States	N/A	Some college	Some college		Unemployed and looking for work	Unemployed and looking for work		$5001-$10000	$0~$15000
Yes	2016-09-24	Negative	English	SPA4	Yes	Grindr	7	Yes	Yes	Yes	Yes	Yes	Yes	Yes	Yes	Yes	Yes	Yes	Yes	Boredom		Yes	No	No	No	No	Yes	No	No	No	No	No	No		38	36-45	92805	Mexico	United States	United States	N/A	Bachelor’s degree	Bachelor’s degree		Working full time	Working full time		More than $50000	More than $30000
Yes	2016-09-24	Negative	Spanish	SPA4	Yes	Jack'd	7	Yes	Yes	Yes	Yes	Yes	Yes	Yes	Yes	No	No	No	No	Boredom		Yes	No	No	No	No	Yes	No	Yes	Yes	Yes	No	No		39	36-45	91356	Venezuela	Venezuela	Other	39	Bachelor’s degree	Bachelor’s degree		Unemployed and looking for work	Unemployed and looking for work		$0-$5000	$0~$15000
Yes	2016-09-26	Negative	English	SPA3	Yes	Grindr	7	Yes	Yes	Yes	Yes	Yes	Yes	Yes	No	No	Yes	Yes	No	To meet someone		Yes	No	No	No	Yes	Yes	Yes	No	Yes	Yes	No	No		31	26-35	91730	Mexico	United States	United States	N/A	Grade 12	Grade 12		Unemployed and looking for work	Unemployed and looking for work		$0-$5000	$0~$15000
Yes	2016-09-26	Negative	English	SPA7	Yes	Jack'd	7	Yes	Yes	Yes	Yes	Yes	Yes	Yes	No	No	No	Yes	Yes	Sex (hook-up)		No	No	No	No	No	No	No	Yes	No	Yes	No	No		21	18-25	90033	Mexico	United States	United States	N/A	Grade 12	Grade 12		Working full time	Working full time		$20001-$25000	$15001~$30000
Yes	2016-09-27	Negative	English	SPA3	Yes	Grindr	7	Yes	Yes	Yes	Yes	Yes	Yes	Yes	No	Yes	No	Yes	No	Entertainment		No	No	No	No	No	No	Yes	Yes	No	No	No	Yes	Curiosity	38	36-45	91762	Mexico	Mexico	Mexico	11	Grades 9 through 11	Grades 9 through 11		Unemployed and not looking for work	Unemployed and not looking for work		$30001-$35000	More than $30000
No	2016-09-29	Negative	English	SPA4	Yes	Grindr	7	Yes	Yes	Yes	Yes	Yes	Yes	Yes	No	No	Yes	No	No	Loneliness		Yes	No	No	Yes	No	No	No	Yes	No	No	No	No		30	26-35	90057	Puerto Rico (Dad) & Mexico (Mom)	United States	United States	N/A	Bachelor’s degree	Bachelor’s degree		Unemployed and looking for work	Unemployed and looking for work		$0-$5000	$0~$15000
Yes	2016-09-30	Negative	Spanish	SPA4	Yes	Grindr	3	Yes	No	No	Yes	No	No	Yes	Yes	Yes	No	No	Yes	To meet someone		Yes	No	No	No	No	No	Yes	No	No	Yes	No	No		39	36-45	91405	El Salvador	El Salvador	Other	28	Grades 9 through 11	Grades 9 through 11		Working full time	Working full time		$10001-$15000	$0~$15000
Yes	2016-09-30	Negative	English	SPA7	Yes	Grindr	7	Yes	Yes	Yes	Yes	Yes	Yes	Yes	No	Yes	Yes	Yes	Yes	Dating		No	No	No	No	No	No	Yes	Yes	Yes	No	No	No		23	18-25	92708	Mexico	United States	United States	N/A	Associate degree	Associate degree		Working part-time	Working part time		$0-$5000	$0~$15000
Yes	2016-10-03	Negative	English	SPA4	Yes	Grindr	2	No	No	No	No	Yes	Yes	No	No	No	No	Yes	Yes	Dating		Yes	No	No	No	No	No	No	Yes	Yes	No	No	No		50	46-55	90013	Mexico (mother) & Spain (father)	United States	United States	N/A	Technical degree	Technical degree		Working full time	Working full time		$15001-$20000	$15001~$30000
No	2016-10-03	Negative	English	SPA7	Yes	Growler	7	Yes	Yes	Yes	Yes	Yes	Yes	Yes	No	No	Yes	Yes	No	Boredom		Yes	No	No	No	Yes	No	No	No	Yes	Yes	No	No		41	36-45	90032	Mexico	Mexico	Mexico	4	Grade 12	Grade 12		Working part-time	Working part time		$25001-$30000	$15001~$30000
No	2016-10-03	Negative	English	SPA7	Yes	Jack'd	7	Yes	Yes	Yes	Yes	Yes	Yes	Yes	No	Yes	Yes	Yes	No	Sex (hook-up)		No	No	No	No	No	No	No	No	No	Yes	No	No		24	18-25	91780	Mexico	United States	United States	N/A	Some college	Some college		Working part-time	Working part time		$0-$5000	$0~$15000
Yes	2016-10-04	Negative	Spanish	SPA4	Yes	Grindr	2	No	No	No	No	Yes	Yes	No	No	Yes	Yes	No	No	To meet someone		Yes	No	No	No	No	Yes	No	No	No	No	No	No		30	26-35	91606	Mexico	Mexico	Mexico	28	Grade 12	Grade 12		Working part-time	Working part time		$0-$5000	$0~$15000
No	2016-10-05	Negative	English	SPA4	Yes	Growler	1	No	No	No	No	No	Yes	Yes	No	No	No	No	Yes	Friendship (to keep in touch, to see who is there)		No	Yes	No	No	No	No	No	No	No	No	No	No		28	26-35	90001	Mexico (Grandmother)	United States	United States	N/A	Grade 12	Grade 12		Working full time	Working full time		More than $50000	More than $30000
No	2016-10-05	Negative	English	SPA4	Yes	Growler	7	Yes	Yes	Yes	Yes	Yes	Yes	Yes	No	No	No	Yes	Yes	Friendship (to keep in touch, to see who is there)		No	No	No	No	No	No	No	Yes	Yes	Yes	Yes	No		37	36-45	90019	Mexico	United States	United States	N/A	Grade 12	Grade 12		Unemployed and not looking for work	Unemployed and not looking for work		$0-$5000	$0~$15000
Yes	2016-10-05	Negative	English	SPA4	Yes	Jack'd	7	Yes	Yes	Yes	Yes	Yes	Yes	Yes	No	No	No	Yes	Yes	Loneliness		Yes	No	No	No	No	No	No	Yes	Yes	No	No	No		29	26-35	93033	Mexico	United States	United States	N/A	Grade 12	Grade 12		Working full time	Working full time		$20001-$25000	$15001~$30000
Yes	2016-10-06	Negative	English	SPA7	Yes	Growler	3	Yes	Yes	No	Yes	Yes	No	No	No	No	Yes	Yes	Yes	Entertainment		Yes	No	No	No	Yes	No	Yes	No	Yes	Yes	No	No		32	26-35	91732	Mexico	United States	United States	N/A	Grades 9 through 11	Grades 9 through 11		Working part-time	Working part time	Student	$5001-$10000	$0~$15000
Yes	2016-10-08	Negative	English	SPA7	Yes	Growler	4	No	No	Yes	Yes	Yes	Yes	Yes	Yes	No	No	Yes	Yes	Boredom		Yes	Yes	Yes	Yes	No	Yes	No	Yes	No	No	No	No		32	26-35	90640	Mexico	United States	United States	N/A	Associate degree	Associate degree		Working full time	Working full time		$40001-$45000	More than $30000
Yes	2016-10-10	Negative	English	SPA3	Yes	Grindr	7	Yes	Yes	Yes	Yes	Yes	Yes	Yes	No	Yes	Yes	Yes	No	Sex (hook-up)		Yes	No	No	No	No	No	Yes	Yes	Yes	Yes	No	No		26	26-35	91766	Mexico	Mexico	Mexico	8	Some college	Some college		Working full time	Working full time		$20001-$25000	$15001~$30000
Yes	2016-10-11	Negative	English	SPA7	Yes	Grindr	7	Yes	Yes	Yes	Yes	Yes	Yes	Yes	No	Yes	Yes	Yes	Yes	Boredom		Yes	No	No	No	Yes	No	No	Yes	No	Yes	No	No		24	18-25	90640	Mexico	United States	United States	N/A	Grade 12	Grade 12		Working full time	Working full time		$20001-$25000	$15001~$30000
Yes	2016-10-12	Negative	English	SPA4	Yes	Grindr	7	Yes	Yes	Yes	Yes	Yes	Yes	Yes	No	No	No	No	Yes	Friendship (to keep in touch, to see who is there)		No	No	No	No	No	No	No	No	Yes	No	No	No		25	18-25	90047	Mexico	United States	United States	N/A	Grade 12	Grade 12		Unemployed and looking for work	Unemployed and looking for work		$0-$5000	$0~$15000
Yes	2016-10-12	Negative	English	SPA7	Yes	Grindr	4	Yes	Yes	Yes	Yes	Yes	No	No	No	No	Yes	Yes	No	Entertainment		Yes	No	No	No	Yes	Yes	Yes	No	Yes	No	No	No		27	26-35	90037	Mexico	Mexico	Mexico	6	Grades 9 through 11	Grades 9 through 11		Unemployed and looking for work	Unemployed and looking for work	Volunteer	$15001-$20000	$15001~$30000
Yes	2016-10-12	Positive	English	SPA7	Yes	Grindr	3	No	No	No	No	Yes	Yes	No	No	Yes	Yes	Yes	No	Friendship (to keep in touch, to see who is there)		Yes	No	No	No	No	No	No	No	Yes	No	No	No		35	26-35	90003	Mexico	United States	United States	N/A	Some college	Some college		Unemployed and looking for work	Unemployed and looking for work	Student	$20001-$25000	$15001~$30000
Yes	2016-10-15	Negative	English	SPA7	Yes	Growler	7	Yes	Yes	Yes	Yes	Yes	Yes	Yes	Yes	Yes	No	No	Yes	Sex (hook-up)		No	Yes	No	No	No	Yes	Yes	No	Yes	Yes	No	No		41	36-45	91001	Mexico	United States	United States	N/A	Some college	Some college		Working part-time	Working part time		$10001-$15000	$0~$15000
Yes	2016-10-18	Negative	English	SPA4	Yes	Jack'd	7	Yes	Yes	Yes	Yes	Yes	Yes	Yes	Yes	Yes	No	Yes	Yes	Sex (hook-up)		No	No	No	No	No	Yes	Yes	Yes	No	Yes	No	No		45	36-45	90062	Mexico (father)	United States	United States	N/A	Grades 9 through 11	Grades 9 through 11		Unemployed and looking for work	Unemployed and looking for work		$0-$5000	$0~$15000
Yes	2016-10-19	Negative	English	SPA7	Yes	Grindr	7	Yes	Yes	Yes	Yes	Yes	Yes	Yes	Yes	No	Yes	Yes	Yes	Sex (hook-up)		No	No	No	No	No	No	Yes	Yes	Yes	No	No	No		29	26-35	91801	Mexico	United States	United States	N/A	Bachelor’s degree	Bachelor’s degree		Working full time	Working full time		$40001-$45000	More than $30000
Yes	2016-10-21	Negative	English	SPA3	Yes	Grindr	7	Yes	Yes	Yes	Yes	Yes	Yes	Yes	Yes	Yes	No	Yes	Yes	Sex (hook-up)		Yes	No	No	No	Yes	No	No	Yes	Yes	No	No	No		41	36-45	91722	Mexico	United States	United States	N/A	Other	Other	Masters	Working full time	Working full time		More than $50000	More than $30000
Yes	2016-10-24	Negative	English	SPA3	Yes	Grindr	4	No	No	Yes	No	Yes	Yes	Yes	Yes	No	No	Yes	Yes	Entertainment		Yes	No	No	No	Yes	No	No	Yes	Yes	Yes	No	No		24	18-25	91768	Mexico	Mexico	Mexico	14	Some college	Some college		Working full time	Working full time		$5001-$10000	$0~$15000
Yes	2016-10-24	Negative	English	SPA4	Yes	Growler	7	Yes	Yes	Yes	Yes	Yes	Yes	Yes	Yes	Yes	Yes	Yes	Yes	Sex (hook-up)		No	No	No	No	Yes	No	No	No	Yes	No	No	No		26	26-35	90041	El Salvador	United States	United States	N/A	GED	GED		Working part-time	Working part time		$0-$5000	$0~$15000
No	2016-10-26	Negative	English	SPA4	Yes	Growler	2	No	No	Yes	Yes	No	No	No	No	No	Yes	Yes	No	Boredom		No	No	No	No	No	No	No	Yes	Yes	Yes	No	No		27	26-35	90014	Mexico	United States	United States	N/A	Grade 12	Grade 12		Working part-time	Working part time		$10001-$15000	$0~$15000
Yes	2016-10-26	Negative	English	SPA7	Yes	Grindr	7	Yes	Yes	Yes	Yes	Yes	Yes	Yes	No	No	Yes	Yes	Yes	Sex (hook-up)		No	No	No	No	No	Yes	Yes	Yes	Yes	No	No	No		20	18-25	90255	Mexico	United States	United States	N/A	Grades 9 through 11	Grades 9 through 11		Working full time	Working full time		$15001-$20000	$15001~$30000
Yes	2016-10-26	Negative	English	SPA7	Yes	Grindr	1	Yes	Yes	Yes	Yes	Yes	Yes	Yes	Yes	Yes	Yes	Yes	Yes	To meet someone		No	No	No	No	No	No	Yes	Yes	No	Yes	No	No		27	26-35	91744	Mexico	United States	United States	N/A	Grade 12	Grade 12		Working full time	Working full time		$25001-$30000	$15001~$30000
Yes	2016-10-27	Negative	English	SPA7	Yes	Grindr	7	Yes	Yes	Yes	Yes	Yes	Yes	Yes	No	Yes	Yes	Yes	No	To meet someone		Yes	No	No	No	Yes	Yes	Yes	No	Yes	Yes	No	No		43	36-45	90604	Mexico	United States	United States	N/A	Bachelor’s degree	Bachelor’s degree		Working full time	Working full time		$35001-$40000	More than $30000
Yes	2016-10-28	Positive	English	SPA4	Yes	Jack'd	3	No	No	No	No	Yes	Yes	Yes	No	No	No	Yes	Yes	Entertainment		Yes	No	No	No	No	Yes	No	No	No	Yes	No	No		31	26-35	90038	Brazil	Brazil	Other	15	Other	Other	Master Degree	Working full time	Working full time		$20001-$25000	$15001~$30000
No	2016-11-01	Negative	English	SPA3	Yes	Growler	5	Yes	Yes	Yes	Yes	Yes	No	No	No	Yes	No	No	No	Sex (hook-up)		Yes	No	No	No	Yes	No	No	Yes	No	No	No	No		23	18-25	91766	Mexico	United States	United States	N/A	Technical degree	Technical degree		Working full time	Working full time		$25001-$30000	$15001~$30000
Yes	2016-11-01	Negative	English	SPA4	Yes	Growler	7	Yes	Yes	Yes	Yes	Yes	Yes	Yes	Yes	No	No	Yes	No	Loneliness		Yes	No	No	No	Yes	No	Yes	Yes	No	Yes	No	No		27	26-35	90004	Mexico	United States	United States	N/A	Some college	Some college		Working full time	Working full time		$5001-$10000	$0~$15000
Yes	2016-11-01	Negative	English	SPA7	Yes	Grindr	2	No	No	No	No	No	Yes	Yes	No	No	No	Yes	Yes	Boredom		No	No	No	No	No	No	No	Yes	Yes	Yes	No	No		20	18-25	90706	Mexico	United States	United States	N/A	Grade 12	Grade 12		Working full time	Working full time	Part time	$0-$5000	$0~$15000
Yes	2016-11-02	Negative	English	SPA4	Yes	Grindr	7	Yes	Yes	Yes	Yes	Yes	Yes	Yes	No	No	No	No	Yes	Entertainment		Yes	No	No	No	Yes	Yes	Yes	No	Yes	Yes	No	No		23	18-25	90027	Mexico	United States	United States	N/A	Some college	Some college		Unemployed and looking for work	Unemployed and looking for work		$20001-$25000	$15001~$30000
Yes	2016-11-02	Negative	English	SPA7	No	Grindr																													43	36-45	90026	Mexico	Mexico	Mexico	23	Some college	Some college		Working full time	Working full time		$30001-$35000	More than $30000
Yes	2016-11-03	Negative	English	SPA4	Yes		6	No	Yes	Yes	Yes	Yes	Yes	Yes	Yes	No	Yes	Yes	Yes	Sex (hook-up)		No	No	No	No	No	No	Yes	No	No	No	No	No		42	36-45	93534	United States- Family has been here for many generations	United States	United States	N/A	Some college	Some college		Disabled and not working	Disabled and not working		$5001-$10000	$0~$15000
Yes	2016-11-07	Negative	English	SPA4	Yes		5	Yes	No	No	Yes	Yes	Yes	Yes	Yes	No	No	Yes	Yes	To meet someone		Yes	No	No	No	No	Yes	No	No	No	Yes	No	No		33	26-35	91201	Nicaragua	Nicaragua	Other	1	Associate degree	Associate degree		Unemployed and looking for work	Unemployed and looking for work		$10001-$15000	$0~$15000
No	2016-11-10	Negative	English	SPA4	Yes	Growler	4	No	No	No	Yes	Yes	Yes	Yes	No	No	No	Yes	Yes	Sex (hook-up)		No	No	No	No	Yes	No	Yes	Yes	Yes	Yes	No	No		27	26-35	90003	Mexico (Dad) & El Salvador (Mom)	United States	United States	N/A	Grade 12	Grade 12		Working part-time	Working part time		$10001-$15000	$0~$15000
Yes	2016-11-10	Negative	English	SPA4	Yes		1	No	Yes	No	No	No	No	No	No	No	Yes	No	No	Dating		No	No	No	No	Yes	No	No	No	No	No	No	No		25	18-25	90029	El Slavador	United States	United States	N/A	Some college	Some college		Working part-time	Working part time		$5001-$10000	$0~$15000
Yes	2016-11-11	Positive	English	SPA7	Yes	Grindr	7	Yes	Yes	Yes	Yes	Yes	Yes	Yes	No	No	Yes	Yes	Yes	To meet someone		Yes	No	No	No	No	No	No	No	No	Yes	No	No		30	26-35	90021	Dominican Republic	United States	United States	N/A	Bachelor’s degree	Bachelor’s degree		Working full time	Working full time		$40001-$45000	More than $30000
Yes	2016-11-11	Negative	English	SPA7	Yes	Growler	7	Yes	Yes	Yes	Yes	Yes	Yes	Yes	No	No	Yes	Yes	Yes	Boredom		No	No	No	No	No	Yes	No	Yes	No	No	No	No		28	26-35	90063	Mexico	United States	United States	N/A	Grade 12	Grade 12		Working full time	Working full time		$40001-$45000	More than $30000
Yes	2016-11-12	Negative	English	SPA4	Yes	Grindr	2	No	Yes	No	Yes	No	No	No	No	No	No	Yes	No	Sex (hook-up)		No	Yes	No	No	No	No	No	Yes	No	Yes	No	No		35	26-35	90046	Puerto Rico	United States	United States	N/A	Bachelor’s degree	Bachelor’s degree		Working full time	Working full time		$40001-$45000	More than $30000
Yes	2016-11-12	Negative	English	SPA4	Yes	Growler	7	Yes	Yes	Yes	Yes	Yes	Yes	Yes	No	Yes	Yes	No	Yes	Sex (hook-up)		No	No	No	No	Yes	No	Yes	No	No	Yes	No	No		30	26-35	92346	Mexico	United States	United States	N/A	Bachelor’s degree	Bachelor’s degree		Working part-time	Working part time		$5001-$10000	$0~$15000
Yes	2016-11-15	Negative	English	SPA7	Yes	Grindr	3	No	No	No	No	Yes	Yes	Yes	No	No	Yes	Yes	Yes	Sex (hook-up)		No	Yes	No	No	No	No	No	No	No	Yes	No	No		27	26-35	90063	Mexico	United States	United States	N/A	Some college	Some college		Working part-time	Working part time		$5001-$10000	$0~$15000
Yes	2016-11-16	Negative	English	SPA3	Yes	Grindr	1	No	No	No	No	Yes	No	No	No	No	No	Yes	Yes	Party and Play (sex and drugs)		Yes	Yes	Yes	No	No	No	Yes	Yes	Yes	Yes	No	No		27	26-35	91767	Mexico	Mexico	Mexico	3	Grade 12	Grade 12		Unemployed and not looking for work	Unemployed and not looking for work		$5001-$10000	$0~$15000
Yes	2016-11-16	Negative	Spanish	SPA7	Yes	Grindr	7	Yes	Yes	Yes	Yes	Yes	Yes	Yes	No	No	Yes	Yes	Yes	Loneliness		No	No	No	No	No	No	Yes	Yes	Yes	Yes	No	No		32	26-35	90003	El Salvador	El Salvador	Other	19	Some college	Some college		Working full time	Working full time		$15001-$20000	$15001~$30000
No	2016-11-17	Negative	English	SPA4	Yes	Growler	7	Yes	Yes	Yes	Yes	Yes	Yes	Yes	Yes	Yes	Yes	Yes	Yes	To meet someone		Yes	No	No	No	Yes	No	Yes	No	Yes	No	No	No		25	18-25	90032	Mexico	United States	United States	N/A	Grade 12	Grade 12		Working part-time	Working part time		$30001-$35000	More than $30000
Yes	2016-11-19	Negative	English	SPA4	Yes	Growler	2	No	No	No	No	Yes	Yes	No	Yes	Yes	Yes	Yes	Yes	Friendship (to keep in touch, to see who is there)		Yes	No	No	No	No	Yes	No	Yes	No	No	No	No		32	26-35	90059	Puerto Rico and Mexico	United States	United States	N/A	Some college	Some college		Unemployed and looking for work	Unemployed and looking for work		$0-$5000	$0~$15000
Yes	2016-11-19	Negative	English	SPA4	Yes		7	Yes	Yes	Yes	Yes	Yes	Yes	Yes	No	No	No	Yes	Yes	Loneliness		Yes	No	No	No	No	No	No	Yes	No	Yes	No	No		36	36-45	91767	Cuba	United States	United States	N/A	Grade 12	Grade 12		Unemployed and looking for work	Unemployed and looking for work		$5001-$10000	$0~$15000
Yes	2016-11-23	Negative	English	SPA3	Yes	Grindr	5	No	Yes	No	Yes	Yes	Yes	Yes	No	No	No	Yes	Yes	Sex (hook-up)		Yes	No	No	No	Yes	No	No	No	Yes	No	No	No		31	26-35	92532	Mexico	United States	United States	N/A	Some college	Some college		Working full time	Working full time		$25001-$30000	$15001~$30000
Yes	2016-11-23	Negative	English	SPA3	Yes	Grindr	3	No	No	Yes	No	Yes	No	Yes	No	No	Yes	No	No	Dating		No	No	No	No	No	No	No	Yes	Yes	Yes	No	No		34	26-35	91768	El Salvador	El Salvador	Other	18	Some college	Some college		Working full time	Working full time		$25001-$30000	$15001~$30000
Yes	2016-11-26	Negative	English	SPA4	Yes	Growler	4	Yes	No	No	No	Yes	Yes	Yes	Yes	Yes	Yes	Yes	Yes	Sex (hook-up)		No	No	No	No	Yes	Yes	Yes	Yes	Yes	Yes	No	No		27	26-35	90069	Mexico	United States	United States	N/A	Some college	Some college		Unemployed and not looking for work	Unemployed and not looking for work	Student	$0-$5000	$0~$15000
Yes	2016-11-26	Negative	English	SPA4	Yes	Instagram	3	No	No	Yes	No	Yes	Yes	No	No	No	No	Yes	Yes	To meet someone		No	No	No	No	Yes	Yes	No	No	No	No	No	No		39	36-45	90029	Mexico	United States	United States	N/A	Some college	Some college		Working full time	Working full time		$30001-$35000	More than $30000
No	2016-11-28	Negative	English	SPA3	Yes	Growler	5	No	Yes	Yes	No	Yes	Yes	Yes	Yes	Yes	Yes	Yes	Yes	Boredom		Yes	No	No	No	No	No	Yes	Yes	Yes	Yes	No	No		33	26-35	91702	Mexico	United States	United States	N/A	Some college	Some college		Working full time	Working full time		$20001-$25000	$15001~$30000
Yes	2016-11-29	Negative	English	SPA7	Yes	Growler	2	No	No	No	No	No	Yes	Yes	No	No	Yes	Yes	No	Boredom		Yes	No	No	No	Yes	Yes	No	Yes	Yes	Yes	No	No		41	36-45	90744	Mexico	United States	United States	N/A	Some college	Some college		Working part-time	Working part time		$5001-$10000	$0~$15000
Yes	2016-11-29	Negative	English	SPA7	Yes		2	No	No	No	No	Yes	Yes	No	No	No	No	Yes	Yes	Friendship (to keep in touch, to see who is there)		Yes	No	No	No	No	No	No	No	No	No	No	No		26	26-35	90640	Mexico	United States	United States	N/A	Grade 12	Grade 12		Working part-time	Working part time		$10001-$15000	$0~$15000
Yes	2016-11-30	Negative	English	SPA3	Yes	Grindr	7	Yes	Yes	Yes	Yes	Yes	Yes	Yes	Yes	No	Yes	Yes	Yes	Boredom		Yes	No	No	No	Yes	Yes	Yes	Yes	Yes	Yes	No	No		39	36-45	91766	Nicaragua	United States	United States	N/A	Associate degree	Associate degree		Unemployed and looking for work	Unemployed and looking for work		$25001-$30000	$15001~$30000
Yes	2016-11-30	Negative	English	SPA4	Yes	Growler	7	Yes	Yes	Yes	Yes	Yes	Yes	Yes	No	No	Yes	Yes	No	To meet someone		Yes	Yes	No	No	No	No	No	No	No	Yes	No	No		22	18-25	90038	Mexico (mother)	United States	United States	N/A	Some college	Some college		Unemployed and looking for work	Unemployed and looking for work		$5001-$10000	$0~$15000
Yes	2016-12-02	Negative	English	SPA7	Yes	Growler	4	Yes	Yes	Yes	Yes	No	No	No	Yes	Yes	Yes	Yes	Yes	Boredom		Yes	No	No	No	No	No	No	Yes	No	Yes	No	No		20	18-25	90014	Mexico	United States	United States	N/A	Some college	Some college		Working part-time	Working part time		$25001-$30000	$15001~$30000
No	2016-12-03	Negative	English	SPA4	Yes	Growler	3	No	No	No	No	Yes	Yes	Yes	No	No	No	Yes	Yes	Loneliness		Yes	No	No	No	No	No	No	No	Yes	Yes	No	No		62	56-65	90005	Mexico	United States	United States	N/A	Some college	Some college		Retired and not working	Retired and not working		$15001-$20000	$15001~$30000
Yes	2016-12-03	Negative	English	SPA4	Yes	Growler	7	Yes	Yes	Yes	Yes	Yes	Yes	Yes	No	No	No	Yes	No	To meet someone		Yes	No	No	No	Yes	Yes	Yes	No	No	No	No	No		43	36-45	90015	Mexico	United States	United States	N/A	Associate degree	Associate degree		Working full time	Working full time		$45001-$50000	More than $30000
Yes	2016-12-03	Negative	English	SPA4	Yes	Growler	2	No	No	Yes	No	No	Yes	No	No	No	Yes	No	No	Dating		Yes	No	No	No	No	No	Yes	No	Yes	Yes	No	No		49	46-55	91423	Mexico	United States	United States	N/A	Bachelor’s degree	Bachelor’s degree		Working full time	Working full time		More than $50000	More than $30000
No	2016-12-05	Negative	English	SPA3	Yes	Growler	2	No	No	No	No	No	Yes	Yes	No	No	No	No	Yes	Sex (hook-up)		No	No	No	No	No	No	Yes	No	Yes	No	No	No		28	26-35	91767	Guatemala	Guatemala	Other	6	Bachelor’s degree	Bachelor’s degree		Unemployed and looking for work	Unemployed and looking for work		$10001-$15000	$0~$15000
Yes	2016-12-06	Negative	English	SPA3	Yes	Instagram	7	Yes	Yes	Yes	Yes	Yes	Yes	Yes	Yes	No	No	No	Yes	Boredom		Yes	No	No	No	Yes	Yes	No	Yes	No	No	No	No		20	18-25	92410	El Salvador; Mexico	United States	United States	N/A	Grade 12	Grade 12		Working part-time	Working part time		$0-$5000	$0~$15000
No	2016-12-06	Negative	English	SPA3	Yes	Growler	7	Yes	Yes	Yes	Yes	Yes	Yes	Yes	Yes	No	Yes	Yes	Yes	Boredom		Yes	No	No	No	Yes	No	Yes	No	Yes	Yes	No	No		24	18-25	92376	Mexico	United States	United States	N/A	Grade 12	Grade 12		Working full time	Working full time		$10001-$15000	$0~$15000
Yes	2016-12-07	Positive	English	SPA4	Yes		5	No	Yes	Yes	Yes	Yes	Yes	No	No	No	No	Yes	No	Sex (hook-up)		No	No	No	No	No	Yes	Yes	No	No	Yes	No	No		41	36-45	90280	Mexico	United States	United States	N/A	Grade 12	Grade 12		Unemployed and looking for work	Unemployed and looking for work		$10001-$15000	$0~$15000
Yes	2016-12-08	Negative	Spanish	SPA3	Yes	Grindr	1	No	No	No	No	Yes	No	No	No	No	No	Yes	Yes	To meet someone		Yes	No	No	No	No	No	Yes	Yes	No	Yes	No	No		32	26-35	91710	Mexico	Mexico	Mexico	19	Bachelor’s degree	Bachelor’s degree		Working full time	Working full time		$35001-$40000	More than $30000
Yes	2016-12-08	Negative	English	SPA7	Yes	Growler	5	Yes	Yes	Yes	Yes	Yes	No	No	No	No	No	Yes	No	Friendship (to keep in touch, to see who is there)		No	No	No	No	No	No	No	No	No	No	No	No		36	36-45	90042	Mexico	Mexico	Mexico	19	Some college	Some college		Working full time	Working full time		$45001-$50000	More than $30000
Yes	2016-12-13	Negative	English	SPA3	Yes	Growler	3	No	No	Yes	No	Yes	Yes	No	Yes	No	No	Yes	Yes	Sex (hook-up)		No	No	No	No	Yes	No	No	Yes	Yes	No	No	No		34	26-35	91764	Mexico, Puerto Rico	United States	United States	N/A	Some college	Some college		Working full time	Working full time		$30001-$35000	More than $30000
No	2016-12-14	Negative	English	SPA3	Yes	Grindr	7	Yes	Yes	Yes	Yes	Yes	Yes	Yes	No	No	Yes	Yes	No	Sex (hook-up)		Yes	No	No	No	Yes	Yes	Yes	Yes	Yes	No	No	No		23	18-25	92337	Mexico	United States	United States	N/A	Bachelor’s degree	Bachelor’s degree		Working full time	Working full time		$10001-$15000	$0~$15000
No	2016-12-15	Negative	Spanish	SPA3	Yes	Grindr	7	Yes	Yes	Yes	Yes	Yes	Yes	Yes	Yes	Yes	Yes	Yes	Yes	Sex (hook-up)		Yes	No	No	No	No	No	Yes	Yes	No	Yes	No	No		39	36-45	91761	Mexico	Mexico	Mexico	37	Bachelor’s degree	Bachelor’s degree		Working full time	Working full time		$10001-$15000	$0~$15000
No	2016-12-15	Negative	English	SPA7	Yes	Growler	3	No	No	No	Yes	Yes	Yes	No	No	Yes	No	No	No	Boredom		No	No	No	No	No	No	No	No	No	No	No	No		35	26-35	90011	Nicaragua	Nicaragua	Other	3	Bachelor’s degree	Bachelor’s degree		Working full time	Working full time		$35001-$40000	More than $30000
Yes	2016-12-20	Negative	English	SPA3	Yes	Grindr	7	Yes	Yes	Yes	Yes	Yes	Yes	Yes	No	No	No	Yes	Yes	To meet someone		Yes	Yes	No	No	No	No	No	No	No	No	No	No		34	26-35	91762	Mexico	Mexico	Mexico	12	Some college	Some college		Unemployed and looking for work	Unemployed and looking for work		$15001-$20000	$15001~$30000
Yes	2016-12-20	Negative	English	SPA3	Yes	Grindr	7	Yes	Yes	Yes	Yes	Yes	Yes	Yes	Yes	No	Yes	Yes	Yes	Entertainment		Yes	Yes	No	No	No	No	Yes	No	Yes	Yes	No	No		19	18-25	91767	Mexico	United States	United States	N/A	Some college	Some college		Working part-time	Working part time		$0-$5000	$0~$15000
Yes	2016-12-20	Negative	English	SPA3	Yes	Grindr	5	Yes	Yes	Yes	Yes	Yes	Yes	Yes	No	No	No	Yes	No	Boredom		No	No	No	No	No	No	No	No	No	No	No	No		28	26-35	91107	Mexico	United States	United States	N/A	Associate degree	Associate degree		Working part-time	Working part time		$10001-$15000	$0~$15000
No	2016-12-21	Negative	English	SPA7	Yes	Growler	1	No	No	Yes	Yes	No	No	No	No	No	Yes	No	No	Boredom		Yes	Yes	No	No	No	No	No	No	No	Yes	No	No		25	18-25	90059	Mexico	United States	United States	N/A	Technical degree	Technical degree		Working part-time	Working part time		$15001-$20000	$15001~$30000
No	2016-12-21	Negative	English	SPA7	Yes	Growler	1	No	No	No	No	No	No	Yes	No	No	No	Yes	Yes	Boredom		Yes	No	No	No	No	No	No	Yes	Yes	No	No	No		29	26-35	90059	Mexico	United States	United States	N/A	Associate degree	Associate degree		Disabled and not working	Disabled and not working		$0-$5000	$0~$15000
Yes	2016-12-22	Negative	Spanish	SPA7	Yes	Grindr	7	Yes	Yes	Yes	Yes	Yes	Yes	Yes	No	No	No	Yes	Yes	Sex (hook-up)		No	No	No	No	Yes	No	Yes	No	No	No	No	No		43	36-45	92706	Mexico	Mexico	Mexico	28	Bachelor’s degree	Bachelor’s degree		Working full time	Working full time		$40001-$45000	More than $30000
Yes	2016-12-23	Negative	English	SPA3	Yes	Growler	7	Yes	Yes	Yes	Yes	Yes	Yes	Yes	No	No	No	Yes	Yes	Sex (hook-up)		No	No	No	No	No	Yes	Yes	No	No	Yes	No	No		51	46-55	91741	Mexico	United States	United States	N/A	Some college	Some college		Working full time	Working full time		$40001-$45000	More than $30000
No	2016-12-23	Negative	Spanish	SPA7	Yes	Grindr	2	Yes	Yes	Yes	Yes	Yes	Yes	Yes	No	No	No	Yes	No	Sex (hook-up)		No	No	No	No	No	No	No	No	No	No	No	No		52	46-55	90011	El Salvador	El Salvador	Other	28	Grade 12	Grade 12		Working full time	Working full time		$35001-$40000	More than $30000
Yes	2016-12-27	Negative	English	SPA7	Yes	Growler	4	No	No	No	Yes	Yes	Yes	Yes	No	No	No	Yes	Yes	Boredom		Yes	No	No	No	Yes	No	No	Yes	Yes	No	No	No		24	18-25	90262	Costa Rica	United States	United States	N/A	Bachelor’s degree	Bachelor’s degree		Working part-time	Working part time		$5001-$10000	$0~$15000
Yes	2016-12-27	Negative	Spanish	SPA7	Yes	Grindr	7	Yes	Yes	Yes	Yes	Yes	Yes	Yes	Yes	Yes	Yes	Yes	Yes	Entertainment		No	No	No	No	No	No	No	No	No	Yes	No	No		35	26-35	90028	Mexico	Mexico	Mexico	18	Bachelor’s degree	Bachelor’s degree		Unemployed and looking for work	Unemployed and looking for work		$20001-$25000	$15001~$30000
Yes	2016-12-28	Negative	English	SPA4	Yes	Growler	3	No	No	Yes	No	Yes	Yes	No	No	No	Yes	No	No	Friendship (to keep in touch, to see who is there)		Yes	No	No	No	No	No	No	No	Yes	No	No	No		35	26-35	90004	Mexico (Mother)	United States	United States	N/A	Some college	Some college		Unemployed and looking for work	Unemployed and looking for work		$5001-$10000	$0~$15000
Yes	2016-12-28	Negative	English	SPA4	Yes	Growler	3	Yes	No	No	No	No	Yes	Yes	Yes	No	Yes	Yes	Yes	Sex (hook-up)		Yes	No	No	No	No	No	Yes	Yes	Yes	Yes	No	No		26	26-35	91744	USA	United States	United States	N/A	Some college	Some college		Working full time	Working full time		$40001-$45000	More than $30000
Yes	2016-12-28	Negative	Spanish	SPA4	Yes	Grindr	7	Yes	Yes	Yes	Yes	Yes	Yes	Yes	No	No	No	Yes	Yes	Sex (hook-up)		No	No	No	No	No	No	No	Yes	Yes	Yes	No	No		32	26-35	91402	Mexico	Mexico	Mexico	31	Bachelor’s degree	Bachelor’s degree		Working full time	Working full time
No	2016-12-28	Negative	English	SPA4	Yes	Grindr	2	No	Yes	Yes	No	No	No	No	No	Yes	No	Yes	No	Boredom		Yes	Yes	No	No	No	No	Yes	Yes	No	Yes	No	No		26	26-35	90006	El Salvador (Mother)	United States	United States	N/A	Some college	Some college		Working part-time	Working part time		$35001-$40000	More than $30000
Yes	2016-12-28	Negative	Spanish	SPA7	Yes	Growler	7	Yes	Yes	Yes	Yes	Yes	Yes	Yes	Yes	Yes	Yes	Yes	Yes	Friendship (to keep in touch, to see who is there)		Yes	No	No	No	Yes	Yes	No	No	Yes	No	No	No		46	46-55	90043	Mexico	Mexico	Mexico	30	Bachelor’s degree	Bachelor’s degree		Disabled and not working	Disabled and not working		$0-$5000	$0~$15000
Yes	2016-12-29	Negative	English	SPA3	Yes	Growler	1	Yes	Yes	Yes	Yes	Yes	Yes	Yes	No	No	No	Yes	Yes	Friendship (to keep in touch, to see who is there)		Yes	No	No	No	No	Yes	Yes	No	Yes	No	No	No		33	26-35	91792	Mexico	United States	United States	N/A	Associate degree	Associate degree		Working part-time	Working part time		$0-$5000	$0~$15000
Yes	2016-12-29	Positive	English	SPA7	Yes	Grindr	3	No	No	No	No	Yes	Yes	Yes	Yes	Yes	Yes	Yes	Yes	Dating		Yes	Yes	Yes	No	Yes	No	No	Yes	Yes	No	No	No		40	36-45	90044	El Salvador	United States	United States	N/A	Grades 9 through 11	Grades 9 through 11		Disabled and not working	Disabled and not working		$0-$5000	$0~$15000
Yes	2016-12-29	Negative	Spanish	SPA7	Yes	Grindr	2	No	No	No	No	No	Yes	Yes	No	No	Yes	Yes	Yes	Boredom		Yes	No	No	No	No	No	No	No	No	Yes	No	No		36	36-45	91744	Mexico	Mexico	Mexico	17	Grades 7 or 8	Grades 7 or 8		Working part-time	Working part time		$25001-$30000	$15001~$30000
Yes	2017-01-03	Negative	English	SPA3	Yes	Growler	7	Yes	Yes	Yes	Yes	Yes	Yes	Yes	Yes	No	Yes	Yes	Yes	Boredom		Yes	No	No	No	Yes	Yes	Yes	Yes	Yes	Yes	No	No		38	36-45	91710	Ecuador	United States	United States	N/A	Some college	Some college		Working part-time	Working part time		$10001-$15000	$0~$15000
Yes	2017-01-03	Negative	Spanish	SPA3	No	Instagram																													30	26-35	92704	Mexico	Mexico	Mexico	19	Grade 12	Grade 12		Working full time	Working full time		$20001-$25000	$15001~$30000
Yes	2017-01-03	Negative	Spanish	SPA4	Yes	Grindr	7	Yes	Yes	Yes	Yes	Yes	Yes	Yes	No	Yes	Yes	Yes	Yes	Sex (hook-up)		No	No	No	No	No	No	No	No	Yes	No	No	No		43	36-45	90017	Mexico	United States	United States	14	Grades 9 through 11	Grades 9 through 11		Working full time	Working full time		$10001-$15000	$0~$15000
Yes	2017-01-04	Negative	English	SPA4	Yes	Instagram	7	Yes	Yes	Yes	Yes	Yes	Yes	Yes	No	Yes	Yes	Yes	Yes	Sex (hook-up)		No	No	No	No	No	No	Yes	Yes	Yes	Yes	No	No		23	18-25	91331	Mexico	United States	United States	N/A	Bachelor’s degree	Bachelor’s degree		Working part-time	Working part time		$10001-$15000	$0~$15000
Yes	2017-01-04	Negative	Spanish	SPA7	Yes	Grindr	7	Yes	Yes	Yes	Yes	Yes	Yes	Yes	No	No	No	Yes	Yes	Dating		Yes	No	No	No	No	Yes	Yes	Yes	No	No	No	No		49	46-55	90063	Mexico	Mexico	Mexico	27	Grade 12	Grade 12		Working full time	Working full time		$10001-$15000	$0~$15000
Yes	2017-01-10	Negative	English	SPA3	Yes	Grindr	3	No	No	No	No	Yes	Yes	Yes	Yes	No	No	Yes	Yes	Sex (hook-up)		Yes	No	No	No	No	No	Yes	No	No	Yes	No	No		26	26-35	91732	Mexico	Mexico	Mexico	7	Some college	Some college		Working part-time	Working part time		$5001-$10000	$0~$15000
Yes	2017-01-10	Negative	English	SPA3	No	Instagram																													20	18-25	91768	Mexico	United States	United States	N/A	Some college	Some college		Working part-time	Working part time		$0-$5000	$0~$15000
Yes	2017-01-10	Negative	English	SPA4	Yes	Grindr	7	Yes	Yes	Yes	Yes	Yes	Yes	Yes	Yes	No	No	Yes	No	Sex (hook-up)		No	No	No	No	No	No	No	No	Yes	Yes	No	No		28	26-35	90005	Mexico	United States	United States	N/A	Some college	Some college		Working full time	Working full time		$40001-$45000	More than $30000
Yes	2017-01-11	Negative	English	SPA3	Yes	Grindr	7	Yes	Yes	Yes	Yes	Yes	Yes	Yes	No	Yes	Yes	Yes	Yes	Sex (hook-up)		Yes	No	No	No	No	No	No	No	No	Yes	No	No		22	18-25	91764	Mexico	United States	United States	N/A	Some college	Some college		Working full time	Working full time		$0-$5000	$0~$15000
No	2017-01-11	Negative	English	SPA4	Yes	Grindr	7	Yes	Yes	Yes	Yes	Yes	Yes	Yes	Yes	Yes	Yes	Yes	Yes	Entertainment		Yes	No	No	No	No	Yes	Yes	No	No	No	No	No		37	36-45	91607	Colombia	Colombia	Other	18	Associate degree	Associate degree		Unemployed and looking for work	Unemployed and looking for work		$0-$5000	$0~$15000
Yes	2017-01-12	Negative	English	SPA3	Yes	Grindr	7	Yes	Yes	Yes	Yes	Yes	Yes	Yes	Yes	No	Yes	Yes	Yes	Sex (hook-up)		No	No	No	No	Yes	No	Yes	Yes	Yes	Yes	No	No		20	18-25	90650	Mexico (Father) El Salvador (mother)	United States	United States	N/A	Grade 12	Grade 12		Working full time	Working full time		$0-$5000	$0~$15000
Yes	2017-01-13	Negative	English	SPA7	Yes	Grindr	7	Yes	Yes	Yes	Yes	Yes	Yes	Yes	No	No	Yes	Yes	Yes	Dating		Yes	No	No	No	No	Yes	Yes	No	Yes	Yes	No	No		42	36-45	90201	Mexico	United States	United States	N/A	Other	Other	Masters	Working full time	Working full time		More than $50000	More than $30000
No	2017-01-14	Negative	Spanish	SPA4	Yes		7	Yes	Yes	Yes	Yes	Yes	Yes	Yes	No	No	Yes	No	No	Sex (hook-up)		No	No	No	No	No	No	Yes	No	Yes	Yes	No	No		40	36-45	91356	Venezuela	Venezuela	Other	39	Bachelor’s degree	Bachelor’s degree		Unemployed and looking for work	Unemployed and looking for work		$5001-$10000	$0~$15000
Yes	2017-01-14	Negative	English	SPA4	Yes	Growler	7	Yes	Yes	Yes	Yes	Yes	Yes	Yes	Yes	Yes	Yes	Yes	Yes	Loneliness		Yes	No	No	No	Yes	No	No	Yes	Yes	Yes	No	No		30	26-35	90775	Mexico	United States	United States	N/A	Bachelor’s degree	Bachelor’s degree		Working part-time	Working part time		$20001-$25000	$15001~$30000
Yes	2017-01-14	Negative	English	SPA4	No	Facebook																													23	18-25	90813	Mexico	United States	United States	N/A	Grade 12	Grade 12		Working part-time	Working part time		$25001-$30000	$15001~$30000
No	2017-01-18	Negative	English	SPA4	Yes	Grindr	7	Yes	Yes	Yes	Yes	Yes	Yes	Yes	No	Yes	Yes	No	No	Other	To see if his husbend is online (on 1).	Yes	No	No	No	Yes	Yes	Yes	Yes	No	Yes	No	No		28	26-35	90037	Mexico(Dad), Italy(Mom)	Mexico	Mexico	7	Grades 9 through 11	Grades 9 through 11		Other (e.g. student, day laborer)	Other (e.g. student, day laborer)		$15001-$20000	$15001~$30000
No	2017-01-18	Negative	English	SPA4	Yes	Grindr	3	No	No	No	No	Yes	Yes	Yes	No	No	Yes	Yes	No	Friendship (to keep in touch, to see who is there)		No	No	No	No	No	No	No	No	Yes	No	No	No		38	36-45	90038	Mexico	United States	United States	N/A	Bachelor’s degree	Bachelor’s degree		Working full time	Working full time		$30001-$35000	More than $30000
Yes	2017-01-18	Negative	English	SPA4	Yes	Grindr	5	Yes	No	No	Yes	Yes	Yes	Yes	Yes	No	No	No	Yes	Sex (hook-up)		No	Yes	No	Yes	No	Yes	Yes	No	No	No	No	No		30	26-35	90034	Mexico	United States	United States	N/A	Some college	Some college		Unemployed and looking for work	Unemployed and looking for work		$30001-$35000	More than $30000
Yes	2017-01-19	Negative	English	SPA7	Yes	Growler	7	Yes	Yes	Yes	Yes	Yes	Yes	Yes	No	Yes	No	Yes	No	Sex (hook-up)		No	No	No	No	Yes	No	Yes	Yes	Yes	Yes	No	No		30	26-35	90262	Mexico/Nicaragua	United States	United States	N/A	Some college	Some college		Working full time	Working full time		$0-$5000	$0~$15000
Yes	2017-01-20	Negative	English	SPA4	Yes	Grindr	7	Yes	Yes	Yes	Yes	Yes	Yes	Yes	No	No	No	Yes	Yes	Sex (hook-up)		No	Yes	No	No	No	Yes	Yes	No	Yes	Yes	No	No		33	26-35	90041	Mexico	United States	United States	N/A	Grade 12	Grade 12		Unemployed and not looking for work	Unemployed and not looking for work		$5001-$10000	$0~$15000
No	2017-01-21	Negative	English	SPA4	Yes	Growler	7	Yes	Yes	Yes	Yes	Yes	Yes	Yes	No	Yes	No	No	No	Sex (hook-up)		No	No	No	No	Yes	No	No	No	No	No	No	No		37	36-45	90037	Mexico	United States	United States	N/A	Grade 12	Grade 12		Unemployed and looking for work	Unemployed and looking for work		$0-$5000	$0~$15000
Yes	2017-01-21	Positive	English	SPA4	Yes	Grindr	7	Yes	Yes	Yes	Yes	Yes	Yes	Yes	No	Yes	No	No	No	Sex (hook-up)		No	Yes	No	No	No	No	Yes	No	No	No	No	No		36	36-45	90022	Mexico	United States	United States	N/A	Some college	Some college		Disabled and not working	Disabled and not working		$10001-$15000	$0~$15000
Yes	2017-01-23	Negative	Spanish	SPA3	Yes	Growler	4	No	No	No	Yes	Yes	Yes	Yes	No	No	No	Yes	Yes	Sex (hook-up)		No	No	No	No	No	No	No	Yes	Yes	Yes	No	No		24	18-25	91768	Venezuela	Venezuela	Other	24	Bachelor’s degree	Bachelor’s degree		Working full time	Working full time		$10001-$15000	$0~$15000
No	2017-01-23	Negative	English	SPA7	Yes		7	Yes	Yes	Yes	Yes	Yes	Yes	Yes	No	Yes	Yes	Yes	No	To meet someone		Yes	No	No	No	Yes	No	No	Yes	No	No	No	No		43	36-45	90063	Mexico	Mexico	Mexico	4	Grade 12	Grade 12		Working full time	Working full time		More than $50000	More than $30000
No	2017-01-25	Negative	English	SPA4	Yes	Grindr	2	Yes	No	No	No	No	No	Yes	No	No	No	Yes	Yes	Boredom		No	No	No	No	No	No	No	Yes	No	No	No	No		27	26-35	90057	Mexico (Dad)	United States	United States	N/A	Some college	Some college		Working part-time	Working part time		$20001-$25000	$15001~$30000
No	2017-01-27	Negative	English	SPA7	Yes		0	Yes	Yes	Yes	Yes	Yes	Yes	No	No	No	No	Yes	No	Sex (hook-up)		No	No	No	No	No	No	Yes	Yes	No	No	No	No		25	18-25	91780	Mexico	United States	United States	N/A	Some college	Some college		Working full time	Working full time		$30001-$35000	More than $30000
Yes	2017-01-27	Negative	English	SPA7	Yes	Grindr	1	No	No	No	No	Yes	Yes	Yes	No	No	Yes	Yes	Yes	To meet someone		Yes	No	No	No	Yes	No	No	No	No	Yes	No	No		22	18-25	90032	El Salvador/Guatemala	United States	United States	N/A	Grades 9 through 11	Grades 9 through 11		Working part-time	Working part time		$15001-$20000	$15001~$30000
Yes	2017-02-01	Negative	English	SPA4	Yes	Grindr	7	Yes	Yes	Yes	Yes	Yes	Yes	Yes	No	No	No	No	Yes	Dating		Yes	No	No	No	No	No	Yes	No	Yes	Yes	No	No		25	18-25	90069	Mexico (Mother), Cuba (Father)	United States	United States	N/A	Some college	Some college		Working full time	Working full time		$10001-$15000	$0~$15000
Yes	2017-02-01	Negative	English	SPA7	Yes	Growler	7	Yes	Yes	Yes	Yes	Yes	Yes	Yes	No	Yes	No	Yes	No	Entertainment		No	No	No	No	No	No	Yes	Yes	Yes	Yes	No	No		55	46-55	90640	Mexico	United States	United States	N/A	Other	Other	Masters	Other (e.g. student, day laborer)	Other (e.g. student, day laborer)	Consultant work	$40001-$45000	More than $30000
Yes	2017-02-01	Negative	English	SPA7	Yes		5	Yes	Yes	Yes	Yes	Yes	Yes	Yes	No	No	Yes	Yes	No	Loneliness		Yes	No	No	No	No	No	No	Yes	No	Yes	Yes	No		28	26-35	90042	Mexico	United States	United States	N/A	Some college	Some college		Unemployed and looking for work	Unemployed and looking for work		$0-$5000	$0~$15000
Yes	2017-02-02	Negative	English	SPA4	Yes	Grindr	7	Yes	Yes	Yes	Yes	Yes	Yes	Yes	No	Yes	No	Yes	Yes	Dating		Yes	Yes	No	No	No	No	Yes	No	Yes	No	No	No		24	18-25	90723	Mexico	United States	United States	N/A	Some college	Some college		Working part-time	Working part time		$0-$5000	$0~$15000
Yes	2017-02-07	Negative	English	SPA3	Yes	Grindr	5	No	No	Yes	Yes	Yes	Yes	Yes	Yes	No	No	Yes	Yes	To meet someone		Yes	No	No	No	Yes	No	Yes	Yes	Yes	No	No	No		31	26-35	91766	Mexico	United States	United States	N/A	Some college	Some college		Working full time	Working full time		$25001-$30000	$15001~$30000
Yes	2017-02-08	Negative	English	SPA7	Yes	Grindr	5	Yes	Yes	Yes	Yes	Yes	No	No	No	No	No	Yes	Yes	Sex (hook-up)		No	No	No	No	Yes	No	No	No	No	No	No	No		42	36-45	90033	Mexico	United States	United States	N/A	Bachelor’s degree	Bachelor’s degree		Working full time	Working full time		$45001-$50000	More than $30000
Yes	2017-02-09	Negative	English	SPA3	Yes	Grindr	7	Yes	Yes	Yes	Yes	Yes	Yes	Yes	Yes	Yes	Yes	Yes	Yes	Boredom		Yes	No	No	No	No	No	No	No	Yes	Yes	Yes	No		24	18-25	91767	Mexico	United States	United States	N/A	Some college	Some college		Unemployed and looking for work	Unemployed and looking for work		$10001-$15000	$0~$15000
Yes	2017-02-09	Negative	English	SPA3	Yes	Growler	5	No	No	Yes	Yes	Yes	Yes	Yes	No	Yes	Yes	Yes	Yes	Boredom		Yes	No	No	No	Yes	Yes	No	Yes	No	Yes	No	No		25	18-25	91790	Mexico (Mother)	United States	United States	N/A	Bachelor’s degree	Bachelor’s degree		Working full time	Working full time		$30001-$35000	More than $30000
Yes	2017-02-09	Negative	English	SPA4	Yes	Grindr	7	Yes	Yes	Yes	Yes	Yes	Yes	Yes	Yes	Yes	Yes	Yes	Yes	Boredom		Yes	No	No	No	No	No	No	Yes	No	Yes	No	No		26	26-35	90026	Colombia	United States	United States	N/A	Bachelor’s degree	Bachelor’s degree		Working full time	Working full time		$35001-$40000	More than $30000
Yes	2017-02-09	Negative	English	SPA7	Yes	Growler	1	No	No	No	No	No	Yes	Yes	No	No	Yes	Yes	No	Dating		Yes	No	No	No	No	No	No	No	Yes	Yes	No	No		47	46-55	90033	Mexico	United States	United States	N/A	Bachelor’s degree	Bachelor’s degree		Unemployed and looking for work	Unemployed and looking for work		More than $50000	More than $30000
No	2017-02-10	Negative	English	SPA3	Yes	Growler	5	Yes	Yes	Yes	Yes	Yes	No	No	No	Yes	Yes	No	No	Sex (hook-up)		No	No	No	No	No	No	No	No	No	No	No	No		24	18-25	91766	Mexico	United States	United States	N/A	Technical degree	Technical degree		Unemployed and looking for work	Unemployed and looking for work		$25001-$30000	$15001~$30000
No	2017-02-10	Negative	English	SPA7	Yes	Grindr	7	Yes	Yes	Yes	Yes	Yes	Yes	Yes	No	No	Yes	Yes	Yes	Sex (hook-up)		No	No	No	No	Yes	No	No	Yes	No	Yes	No	No		30	26-35	90022	Mexico	United States	United States	N/A	Associate degree	Associate degree		Working part-time	Working part time		$15001-$20000	$15001~$30000
Yes	2017-02-11	Negative	English	SPA4	Yes	Grindr	7	Yes	Yes	Yes	Yes	Yes	Yes	Yes	Yes	Yes	Yes	Yes	Yes	Other	Chat	Yes	Yes	No	No	No	Yes	Yes	Yes	Yes	Yes	No	No		24	18-25	90020	Mexico/El Salvador	United States	United States	N/A	Bachelor’s degree	Bachelor’s degree		Unemployed and looking for work	Unemployed and looking for work		$0-$5000	$0~$15000
Yes	2017-02-14	Negative	Spanish	SPA3	Yes	Grindr	7	Yes	Yes	Yes	Yes	Yes	Yes	Yes	No	Yes	No	Yes	No	Entertainment		Yes	No	No	No	No	Yes	Yes	Yes	Yes	Yes	No	No		45	36-45	90631	Mexico	Mexico	Mexico	25	Grades 1 through 6	Grades 1 through 6		Working full time	Working full time		$35001-$40000	More than $30000
Yes	2017-02-15	Negative	English	SPA7	Yes	Grindr	6	Yes	Yes	Yes	Yes	Yes	Yes	Yes	Yes	No	Yes	Yes	Yes	Boredom		Yes	No	No	No	Yes	No	No	Yes	No	No	No	No		32	26-35	91746	Mexico	United States	United States	N/A	Associate degree	Associate degree		Working full time	Working full time		$15001-$20000	$15001~$30000
Yes	2017-02-16	Negative	English	SPA3	Yes	Growler	7	Yes	Yes	Yes	Yes	Yes	Yes	Yes	Yes	No	No	Yes	Yes	Boredom		Yes	No	No	No	No	No	No	Yes	Yes	No	No	No		25	18-25	91761	Nicaragua	Nicaragua	Other	14	Some college	Some college		Working full time	Working full time		$30001-$35000	More than $30000
Yes	2017-02-17	Negative	English	SPA3	Yes	Grindr	7	Yes	Yes	Yes	Yes	Yes	Yes	Yes	Yes	Yes	Yes	Yes	Yes	Sex (hook-up)		Yes	No	No	No	Yes	Yes	No	No	Yes	Yes	Yes	No		24	18-25	91710	Guatemala, Mexico	United States	United States	N/A	Some college	Some college		Unemployed and looking for work	Unemployed and looking for work		$15001-$20000	$15001~$30000
Yes	2017-02-18	Negative	English	SPA4	Yes	Growler	7	Yes	Yes	Yes	Yes	Yes	Yes	Yes	Yes	No	No	No	Yes	Sex (hook-up)		No	No	No	No	No	No	Yes	No	Yes	Yes	No	No		25	18-25	91746	Mexico	United States	United States	N/A	Some college	Some college		Working full time	Working full time		$20001-$25000	$15001~$30000
Yes	2017-02-18	Positive	English	SPA4	Yes	Grindr	7	Yes	Yes	Yes	Yes	Yes	Yes	Yes	No	No	No	No	Yes	Sex (hook-up)		No	No	No	No	Yes	No	Yes	No	No	No	Yes	No		29	26-35	90028	Mexico	Mexico	Mexico	3	Some college	Some college		Unemployed and looking for work	Unemployed and looking for work		$0-$5000	$0~$15000
No	2017-02-18	Negative	English	SPA4	Yes	Grindr	4	No	No	No	Yes	Yes	Yes	Yes	Yes	No	No	No	Yes	Entertainment		No	No	No	No	No	Yes	Yes	No	Yes	No	No	No		36	36-45	90062	Mexico	United States	United States	N/A	Grade 12	Grade 12		Working part-time	Working part time		$0-$5000	$0~$15000
No	2017-02-21	Negative	English	SPA3	Yes	Grindr	7	Yes	Yes	Yes	Yes	Yes	Yes	Yes	No	No	No	Yes	No	Sex (hook-up)		No	No	No	No	Yes	No	No	No	Yes	Yes	No	No		35	26-35	90011	Mexico	Mexico	Mexico	18	GED	GED		Working part-time	Working part time		$10001-$15000	$0~$15000
Yes	2017-02-21	Negative	Spanish	SPA4	Yes	Growler	7	Yes	Yes	Yes	Yes	Yes	Yes	Yes	No	Yes	Yes	Yes	Yes	Sex (hook-up)		No	No	No	No	Yes	No	Yes	Yes	No	No	No	No		46	46-55	91201	Dominican Republic	Dominican Republic	Other	46	Grade 12	Grade 12		Unemployed and not looking for work	Unemployed and not looking for work		$0-$5000	$0~$15000
Yes	2017-02-21	Negative	Spanish	SPA4	Yes	Grindr	3	Yes	No	No	Yes	No	Yes	No	Yes	Yes	No	No	No	To meet someone		Yes	No	No	No	No	No	No	No	No	Yes	No	No		32	26-35	90037	El Salvador	El Salvador	Other	32	Technical degree	Technical degree		Working part-time	Working part time		$0-$5000	$0~$15000
Yes	2017-02-24	Negative	English	SPA3	Yes	Grindr	5	No	No	Yes	Yes	Yes	Yes	Yes	Yes	Yes	No	No	Yes	Sex (hook-up)		No	No	No	No	Yes	No	No	Yes	Yes	No	No	No		21	18-25	91767	Mexico	Mexico	Mexico	8	Some college	Some college		Working part-time	Working part time		$10001-$15000	$0~$15000
No	2017-02-24	Negative	English	SPA4	Yes	Grindr	3	No	No	No	Yes	Yes	Yes	No	Yes	No	No	No	Yes	Sex (hook-up)		No	Yes	No	No	Yes	No	Yes	Yes	Yes	No	No	No		45	36-45	90046	Puerto Rico	United States	United States	N/A	Bachelor’s degree	Bachelor’s degree		Unemployed and looking for work	Unemployed and looking for work		$25001-$30000	$15001~$30000
Yes	2017-02-24	Negative	English	SPA4	Yes	Grindr	7	Yes	Yes	Yes	Yes	Yes	Yes	Yes	No	No	No	Yes	No	Entertainment		Yes	No	No	No	Yes	No	No	No	No	Yes	No	No		24	18-25	90011	Mexico	United States	United States	N/A	Some college	Some college		Working full time	Working full time		$15001-$20000	$15001~$30000
No	2017-02-25	Negative	English	SPA4	Yes	Grindr	5	No	No	Yes	Yes	Yes	Yes	Yes	Yes	No	Yes	Yes	Yes	Entertainment		Yes	No	Yes	Yes	No	No	No	No	No	Yes	No	No		31	26-35	91405	Mexico/Puerto Rico	United States	United States	N/A	Associate degree	Associate degree		Unemployed and not looking for work	Unemployed and not looking for work		$0-$5000	$0~$15000
Yes	2017-03-01	Negative	English	SPA3	Yes	Growler	4	No	No	Yes	No	Yes	Yes	Yes	Yes	No	Yes	Yes	Yes	Sex (hook-up)		No	No	No	No	Yes	Yes	No	No	Yes	Yes	No	No		24	18-25	91767	Mexico	United States	United States	N/A	Some college	Some college		Working part-time	Working part time		$25001-$30000	$15001~$30000
Yes	2017-03-01	Negative	English	SPA4	Yes	Instagram	3	No	No	No	Yes	Yes	Yes	No	No	No	Yes	No	No	Sex (hook-up)		No	No	No	No	Yes	Yes	Yes	No	No	Yes	No	No		28	26-35	90003	El Salvador (mom), Mexico (dad)	United States	United States	N/A	Grade 12	Grade 12		Working part-time	Working part time		$10001-$15000	$0~$15000
Yes	2017-03-01	Negative	English	SPA4	Yes	Grindr	7	Yes	Yes	Yes	Yes	Yes	Yes	Yes	Yes	No	No	No	Yes	Sex (hook-up)		No	Yes	No	No	No	No	No	No	No	No	No	No		52	46-55	90057	Cuba	United States	United States	N/A	Bachelor’s degree	Bachelor’s degree		Unemployed and not looking for work	Unemployed and not looking for work		$0-$5000	$0~$15000
No	2017-03-01	Negative	English	SPA7	Yes	Growler	7	Yes	Yes	Yes	Yes	Yes	Yes	Yes	No	No	Yes	Yes	Yes	To meet someone		Yes	No	No	No	Yes	Yes	Yes	No	No	Yes	No	No		43	36-45	90063	Mexico	United States	United States	N/A	Technical degree	Technical degree		Working part-time	Working part time		$15001-$20000	$15001~$30000
No	2017-03-01	Negative	English	SPA7	Yes	Grindr	3	Yes	Yes	Yes	Yes	Yes	Yes	Yes	Yes	Yes	Yes	Yes	Yes	To meet someone		Yes	No	No	No	Yes	No	No	No	No	Yes	No	No		46	46-55	90650	Mexico	Mexico	Mexico	8	Grade 12	Grade 12		Unemployed and looking for work	Unemployed and looking for work		$0-$5000	$0~$15000
Yes	2017-03-03	Positive	English	SPA4	Yes	Grindr	2	No	No	No	No	No	Yes	Yes	No	No	Yes	Yes	No	Boredom		Yes	Yes	Yes	No	No	No	Yes	Yes	No	No	No	No		47	46-55	90013	Mexico	United States	United States	N/A	Some college	Some college		Unemployed and looking for work	Unemployed and looking for work		$0-$5000	$0~$15000
Yes	2017-03-04	Positive	English	SPA4	Yes	Instagram	2	No	No	No	No	Yes	Yes	No	No	Yes	No	No	No	Boredom		No	No	No	No	No	No	No	No	No	Yes	No	No		33	26-35	90013	Mexico	Mexico	Mexico	4	Grade 12	Grade 12		Unemployed and looking for work	Unemployed and looking for work		$5001-$10000	$0~$15000
Yes	2017-03-04	Negative	English	SPA4	Yes	Grindr	3	No	No	No	No	Yes	Yes	Yes	No	No	No	Yes	No	Boredom		Yes	No	No	No	Yes	Yes	No	Yes	Yes	Yes	No	No		23	18-25	90027	Mexico	United States	United States	N/A	Some college	Some college		Working part-time	Working part time		$15001-$20000	$15001~$30000
Yes	2017-03-06	Negative	English	SPA7	Yes	Grindr	3	Yes	Yes	Yes	Yes	Yes	Yes	Yes	No	No	No	Yes	Yes	Sex (hook-up)		No	No	No	No	Yes	No	Yes	No	Yes	Yes	No	No		24	18-25	90002	Mexico/Guatemala	United States	United States	N/A	Bachelor’s degree	Bachelor’s degree		Working full time	Working full time		$25001-$30000	$15001~$30000
Yes	2017-03-07	Negative	English	SPA3	Yes	Grindr	4	No	No	No	Yes	Yes	Yes	Yes	No	Yes	Yes	Yes	No	Sex (hook-up)		Yes	No	No	No	Yes	No	No	No	No	No	No	No		31	26-35	92532	Mexico	United States	United States	N/A	Some college	Some college		Working full time	Working full time		$20001-$25000	$15001~$30000
No	2017-03-07	Negative	English	SPA7	Yes	Grindr	3	Yes	Yes	Yes	Yes	Yes	Yes	Yes	No	No	Yes	Yes	No	Friendship (to keep in touch, to see who is there)		Yes	No	No	No	No	No	No	Yes	No	No	No	No		32	26-35	90059	Puerto Rico/ Mexico/ Cuba	United States	United States	N/A	Grade 12	Grade 12		Unemployed and looking for work	Unemployed and looking for work		$0-$5000	$0~$15000
No	2017-03-10	Negative	Spanish	SPA4	Yes		2	No	Yes	Yes	No	No	No	No	No	No	No	Yes	No	Loneliness		No	No	No	No	No	No	Yes	Yes	No	Yes	No	No		43	36-45	90026	Mexico	Mexico	Mexico	21	Some college	Some college		Working full time	Working full time		$25001-$30000	$15001~$30000
No	2017-03-11	Negative	English	SPA7	Yes	Grindr	7	Yes	Yes	Yes	Yes	Yes	Yes	Yes	Yes	Yes	Yes	Yes	Yes	Entertainment		No	No	No	No	Yes	No	Yes	No	No	Yes	No	No		28	26-35	91411	Mexico	United States	United States	N/A	Bachelor’s degree	Bachelor’s degree		Working full time	Working full time		$45001-$50000	More than $30000
No	2017-03-13	Negative	English	SPA3	Yes	Growler	5	Yes	Yes	Yes	Yes	Yes	No	No	No	No	Yes	Yes	No	Dating		No	No	No	No	Yes	No	No	No	Yes	Yes	No	No		22	18-25	91767	Mexico	United States	United States	N/A	Technical degree	Technical degree		Working full time	Working full time		$25001-$30000	$15001~$30000
Yes	2017-03-15	Negative	English	SPA3	Yes	Grindr	7	Yes	Yes	Yes	Yes	Yes	Yes	Yes	Yes	Yes	Yes	Yes	Yes	To meet someone		Yes	No	No	No	Yes	Yes	Yes	Yes	Yes	Yes	No	No		21	18-25	91737	El Salvador	United States	United States	N/A	Some college	Some college		Working part-time	Working part time
No	2017-03-15	Negative	English	SPA7	Yes	Growler	3	No	No	No	No	Yes	Yes	Yes	Yes	Yes	Yes	Yes	Yes	Boredom		Yes	No	No	No	No	No	No	No	No	No	No	No		35	26-35	90011	Nicaragua	Nicaragua	Other	4	Bachelor’s degree	Bachelor’s degree		Working full time	Working full time		$40001-$45000	More than $30000
No	2017-03-16	Negative	English	SPA4	Yes	Grindr	7	Yes	Yes	Yes	Yes	Yes	Yes	Yes	No	No	Yes	Yes	No	Sex (hook-up)		No	No	No	No	Yes	Yes	No	Yes	Yes	Yes	No	No		63	56-65	90005	Mexico	United States	United States	N/A	Some college	Some college		Retired and not working	Retired and not working		$15001-$20000	$15001~$30000
No	2017-03-21	Negative	English	SPA3	Yes	Grindr	3	No	No	No	Yes	Yes	Yes	No	No	No	No	Yes	No	Boredom		Yes	No	No	No	No	No	Yes	No	No	No	No	No		29	26-35	91107	Mexico	United States	United States	N/A	Associate degree	Associate degree		Working part-time	Working part time		$10001-$15000	$0~$15000
Yes	2017-03-23	Negative	English	SPA3	Yes	Grindr	7	Yes	Yes	Yes	Yes	Yes	Yes	Yes	Yes	No	No	Yes	Yes	Dating		No	No	No	No	No	No	No	No	Yes	Yes	No	No		33	26-35	91010	Mexico	United States	United States	N/A	Bachelor’s degree	Bachelor’s degree		Working full time	Working full time		$10001-$15000	$0~$15000
Yes	2017-03-23	Negative	Spanish	SPA3	Yes	Grindr	7	Yes	Yes	Yes	Yes	Yes	Yes	Yes	No	Yes	Yes	Yes	No	Sex (hook-up)		No	No	No	No	Yes	Yes	Yes	Yes	Yes	Yes	No	No		44	36-45	91744	Mexico	Mexico	Mexico	28	Some college	Some college		Working full time	Working full time		$45001-$50000	More than $30000
No	2017-03-24	Negative	English	SPA4	Yes	Growler	5	Yes	Yes	Yes	Yes	Yes	No	No	No	No	Yes	Yes	Yes	Boredom		Yes	No	No	No	Yes	Yes	No	Yes	Yes	Yes	No	No		21	18-25	90015	Mexico (dad), Spain (mom)	United States	United States	N/A	Some college	Some college		Working full time	Working full time		$25001-$30000	$15001~$30000
No	2017-04-05	Negative	English	SPA3	No																														24	18-25	91764	Mexico	United States	United States	N/A	Some college	Some college		Unemployed and looking for work	Unemployed and looking for work		$5001-$10000	$0~$15000
No	2017-04-05	Negative	English	SPA7	Yes	Grindr	3	Yes	No	Yes	No	No	Yes	No	No	No	Yes	Yes	No	Sex (hook-up)		No	No	No	No	No	No	Yes	Yes	No	Yes	No	No		35	26-35	90004	Mexico	United States	United States	N/A	Some college	Some college		Unemployed and looking for work	Unemployed and looking for work		$0-$5000	$0~$15000
No	2017-04-06	Negative	English	SPA3	Yes	Growler	7	Yes	Yes	Yes	Yes	Yes	Yes	Yes	Yes	Yes	Yes	Yes	Yes	Friendship (to keep in touch, to see who is there)		Yes	No	No	No	No	No	Yes	Yes	Yes	No	No	No		25	18-25	91702	Mexico	United States	United States	N/A	Some college	Some college		Working full time	Working full time		$40001-$45000	More than $30000
Yes	2017-04-07	Negative	English	SPA7	Yes	Grindr	3	No	No	No	No	Yes	Yes	Yes	No	No	No	Yes	Yes	Entertainment		No	No	No	No	No	Yes	Yes	No	No	No	No	No		36	36-45	90062	Mexico	United States	United States	N/A	Grade 12	Grade 12		Disabled and not working	Disabled and not working		$0-$5000	$0~$15000
Yes	2017-04-08	Negative	English	SPA3	Yes	Growler	4	No	No	Yes	Yes	No	Yes	Yes	No	Yes	No	Yes	No	Dating		No	Yes	No	No	No	No	No	Yes	Yes	Yes	No	No		32	26-35	90004	Guatemala	United States	United States	N/A	Some college	Some college		Disabled and not working	Disabled and not working		$0-$5000	$0~$15000
Yes	2017-04-10	Negative	English	SPA3	Yes	Growler	2	No	No	No	No	No	Yes	Yes	No	No	No	Yes	Yes	Sex (hook-up)		No	No	No	No	No	No	Yes	Yes	No	No	No	No		23	18-25	91767	Mexico	United States	United States	N/A	Grade 12	Grade 12		Working full time	Working full time		$15001-$20000	$15001~$30000
Yes	2017-04-13	Negative	Spanish	SPA7	Yes	Growler	7	Yes	Yes	Yes	Yes	Yes	Yes	Yes	No	No	Yes	Yes	Yes	Other	Curiosity	No	No	No	No	No	No	No	Yes	No	No	No	No		35	26-35	90301	Mexico	Mexico	Mexico	8	Grade 12	Grade 12		Working full time	Working full time		$20001-$25000	$15001~$30000
No	2017-04-14	Negative	English	SPA4	Yes	Growler	7	Yes	Yes	Yes	Yes	Yes	Yes	Yes	Yes	Yes	Yes	Yes	Yes	Sex (hook-up)		No	No	No	No	Yes	Yes	Yes	Yes	No	Yes	No	No		29	26-35	92553	Mexico	Unted States	United States	N/A	Grade 12	Grade 12		Other (e.g. student, day laborer)	Other (e.g. student, day laborer)	S.S.D.A. (Disability)	$10001-$15000	$0~$15000
Yes	2017-04-14	Negative	English	SPA7	Yes	Hornet	5	Yes	Yes	Yes	Yes	Yes	Yes	Yes	No	No	No	Yes	Yes	Sex (hook-up)		No	No	No	No	Yes	No	No	No	Yes	Yes	No	No		23	18-25	90280	Mexico	United States	United States	N/A	Grade 12	Grade 12		Working full time	Working full time		$30001-$35000	More than $30000
No	2017-04-14	Negative	English	SPA7	Yes	Growler	6	Yes	Yes	Yes	Yes	Yes	Yes	Yes	No	No	Yes	Yes	Yes	Entertainment		Yes	No	No	No	Yes	No	Yes	No	Yes	Yes	No	No		29	26-35	90063	Mexico	Mexico	Mexico	2	Grade 12	Grade 12		Working full time	Working full time		$10001-$15000	$0~$15000
No	2017-04-17	Negative	English	SPA3	Yes	Instagram	7	Yes	Yes	Yes	Yes	Yes	Yes	Yes	Yes	Yes	Yes	Yes	Yes	Boredom		Yes	No	No	No	No	Yes	No	No	Yes	No	No	No		22	18-25	91766	Mexico	United States	United States	N/A	Some college	Some college		Working part-time	Working part time		$15001-$20000	$15001~$30000
Yes	2017-04-19	Negative	Spanish	SPA3	Yes	Grindr	7	Yes	Yes	Yes	Yes	Yes	Yes	Yes	No	No	Yes	Yes	No	Entertainment		Yes	No	No	No	Yes	No	Yes	Yes	Yes	Yes	No	No		43	36-45	91744	Mexico	Mexico	Mexico	17	Grades 7 or 8	Grades 7 or 8		Working full time	Working full time		$15001-$20000	$15001~$30000
Yes	2017-04-19	Positive	English	SPA4	Yes	Grindr	2	No	Yes	Yes	No	No	No	No	No	No	Yes	Yes	Yes	Party and Play (sex and drugs)		No	No	No	No	No	No	Yes	No	No	No	No	No		32	26-35	90031	Mexico	United States	United States	N/A	Some college	Some college		Disabled and not working	Disabled and not working		$5001-$10000	$0~$15000
Yes	2017-04-19	Negative	English	SPA4	Yes	Growler	7	Yes	Yes	Yes	Yes	Yes	Yes	Yes	No	Yes	Yes	Yes	Yes	Sex (hook-up)		No	No	No	Yes	No	Yes	Yes	No	Yes	No	No	No		33	26-35	90029	Mexico	Mexico	Mexico	10	Other	Other	Master Degree	Unemployed and looking for work	Unemployed and looking for work		More than $50000	More than $30000
Yes	2017-04-19	Negative	English	SPA7	Yes	Grindr	7	Yes	Yes	Yes	Yes	Yes	Yes	Yes	No	Yes	Yes	Yes	No	Sex (hook-up)		No	No	No	No	No	Yes	Yes	Yes	No	No	No	No		42	36-45	91504	El Salvador	El Salvador	Other	8	Some college	Some college		Working full time	Working full time		$35001-$40000	More than $30000
Yes	2017-04-19	Negative	Spanish	SPA7	Yes	Grindr	4	Yes	Yes	Yes	Yes	Yes	No	No	No	No	Yes	No	No	Loneliness		No	No	No	No	No	No	Yes	Yes	No	Yes	No	No		38	36-45	90026	Mexico	Mexico	Mexico	21	Bachelor’s degree	Bachelor’s degree		Working full time	Working full time		$25001-$30000	$15001~$30000
Yes	2017-04-21	Negative	English	SPA3	Yes	Growler	7	Yes	Yes	Yes	Yes	Yes	Yes	Yes	No	Yes	Yes	Yes	Yes	Friendship (to keep in touch, to see who is there)		Yes	No	No	No	No	No	Yes	Yes	Yes	No	No	No		34	26-35	92503	Mexico	United States	United States	N/A	Some college	Some college		Working full time	Working full time		$45001-$50000	More than $30000
No	2017-04-21	Negative	English	SPA3	Yes	Instagram	2	No	No	No	No	Yes	Yes	No	No	No	No	Yes	No	Dating		Yes	No	No	No	Yes	Yes	Yes	Yes	Yes	No	No	No		24	18-25	92337	Mexico	United States	United States	N/A	Bachelor’s degree	Bachelor’s degree		Working full time	Working full time		$25001-$30000	$15001~$30000
Yes	2017-04-21	Negative	Spanish	SPA4	Yes	Grindr	1	No	No	No	Yes	No	No	No	No	Yes	No	No	No	Sex (hook-up)		No	No	No	No	Yes	No	No	No	No	No	No	No		29	26-35	91505	Mexico	Mexico	Mexico	27	Bachelor’s degree	Bachelor’s degree		Working part-time	Working part time		$25001-$30000	$15001~$30000
Yes	2017-04-21	Negative	English	SPA7	Yes	Grindr	7	Yes	Yes	Yes	Yes	Yes	Yes	Yes	No	No	Yes	Yes	Yes	To meet someone		Yes	No	No	No	Yes	Yes	Yes	Yes	Yes	Yes	No	No		28	26-35	90062	El Salvador	United States	United States	N/A	Some college	Some college		Working full time	Working full time		More than $50000	More than $30000
Yes	2017-04-22	Negative	English	SPA4	Yes	Growler	1	Yes	Yes	Yes	Yes	Yes	Yes	Yes	No	No	No	Yes	Yes	Friendship (to keep in touch, to see who is there)		Yes	No	No	No	No	No	Yes	No	No	No	No	No		42	36-45	90042	Mexico	United States	United States	N/A	Some college	Some college		Working full time	Working full time		$20001-$25000	$15001~$30000
No	2017-04-22	Negative	English	SPA4	Yes	Growler	7	Yes	Yes	Yes	Yes	Yes	Yes	Yes	Yes	No	No	Yes	Yes	Friendship (to keep in touch, to see who is there)		Yes	No	No	No	No	No	No	No	No	No	No	No		37	36-45	90042	Mexico	Mexico	Mexico	19	Some college	Some college		Working full time	Working full time		$40001-$45000	More than $30000
[truncated: 37 more columns]
